## The IgCAM CLMP is required for intestinal and ureteral smooth muscle contraction by regulating Connexin43 and 45 expression in mice

Hanna Langhorst<sup>1</sup>), René Jüttner<sup>1</sup>), Dieter Groneberg<sup>2</sup>), Azadeh Mohtashamdolatsahi<sup>1</sup>), Laura Pelz<sup>1</sup>), Bettina Purfürst<sup>1</sup>), Kai M. Schmidt-Ott<sup>3</sup>), Andreas Friebe<sup>2</sup>) and Fritz G. Rathjen<sup>1,4</sup>)

- 1) Max-Delbrück-Center for Molecular Medicine, DE-13092 Berlin, Germany
- 2) Physiologisches Institut der Universität Würzburg, Röntgenring 9, DE-97070 Würzburg, Germany
- 3) Charité – Universitätsmedizin Berlin, Department of Nephrology, Charitéplatz 1, DE-10117 Berlin, Germany
- 4) Correspondence:  
Fritz G. Rathjen  
Max-Delbrück-Center  
Robert-Rössle-Str. 10  
13092 Berlin, Germany  
Tel.: ++49-30-9406-3709, Fax: ++49 30 9406 2548  
Rathjen@mdc-berlin.de

**Key words:** cell adhesion/IgCAM/CLMP/congenital short-bowel syndrome/peristalsis/hydronephrosis/Connexin43/Connexin45/smooth muscle cells

## Abstract

The function of the IgCAM CLMP which is implicated in congenital short-bowel syndrome in humans was studied in mice. Although the levels of mRNAs encoding Connexin43 or 45 are not or only marginally affected, respectively, absence of CLMP caused a severe reduction of both proteins in smooth muscle cells of the intestine and of Connexin43 in the ureter. Analysis of calcium signaling revealed a disordered cell-cell communication between smooth muscle cells which in turn induced an impaired and uncoordinated motility of the intestine and the ureter. Consequently, insufficient transport of chyme and urine caused a fatal delay to thrive, a high rate of mortality and provoked a severe hydronephrosis in CLMP knockouts. Neurotransmission and the capability of smooth muscle cells to contract in ring preparations of the intestine were not altered. Physical obstructions were not detectable and an overall normal histology in intestine as well as in ureter was observed except for a slight hypertrophy of smooth muscle layers. Deletion of *Clmp* did not lead to a reduced length of the intestine as shown for the human *CLMP* gene but resulted in gut malrotations. In sum, the absence of CLMP caused functional obstructions in the intestinal tract and ureter by impaired peristaltic contractions most likely due to a lack of gap junctional communication between smooth muscle cells.

## Introduction

CLMP (CAR-like membrane protein; also termed ACAM – adipocyte adhesion molecule) is a cell adhesion protein of the Ig superfamily with a widespread tissue and organ distribution in mice with a maximal expression in the brain and heart based on Northern blot data (Raschperger et al., 2004; Eguchi et al., 2005). CLMP co-localizes with the tight junction markers ZO-1 and occludin in transfected cells (Raschperger et al., 2004; Eguchi et al., 2005; Murakami et al., 2016; Van Der Werf et al., 2012). CLMP induced homotypic aggregation when overexpressed in non-polarized CHO cells (Raschperger et al., 2004), but its *in vivo* function is not well defined. In human patients homozygous and compound heterozygous loss-of-function mutations have been characterized in the *CLMP* gene that correlated with congenital short-bowel syndrome (CSBS) – a rare gastrointestinal disorder for which no cure is available (OMIM 615237). These patients have a very short small intestine with a length of approximately 50 cm at birth compared to 190-280 cm in healthy humans (Van Der Werf et al., 2012; Alves et al., 2016; Hamilton et al., 1969; Gonnaud et al., 2016). Of the few patients currently characterized, the best studied mutations – missense mutations in the extracellular domain of CLMP (V124D and C137Y) - resulted in decreased plasma membrane localization of CLMP in transfected cells. Van Der Werf et al. suggested that these mutations might represent null mutations and that CLMP plays a critical role in intestinal development and causes CSBS in humans (Van Der Werf et al., 2012; Van Der Werf et al., 2013). Short-bowel syndrome (SBS) in general as well as CSBS is combined with severe malnutrition due to a decreased absorptive capacity, malrotation of the intestine, severe delay to thrive and in several cases with pyloric hypertrophy. Only 22 percent of patients survived more than one year. Functional obstruction including a disturbed peristalsis has been discussed as the main source for a shortened intestine (Van Der Werf et al., 2015; Schalamon et al., 1999).

In this study, we have analyzed a *Clmp*-deficient mouse model generated by homologous recombination. Unexpectedly, these mice do not reveal a shortened intestine but a high rate of *Clmp* mutants die at neonatal and early postnatal stages. This high degree of mortality is likely caused by insufficient transport of nutrients due to an impaired motility of the intestinal tract. CLMP-deficiency also provoked malrotation of the short bowel and in addition a severe bilateral hydronephrosis due to an uncoordinated contraction of the ureter. Although the level of mRNAs encoding Connexin43 or 45 is not or only slightly reduced in the intestine absence of CLMP strongly decreased expression of both Connexins at the protein level in intestinal and of Connexin43 in ureteral smooth muscle cells. This reduction resulted

in an impaired cell-cell communication as shown by the analysis of calcium transients in the smooth muscle layer. Our research revealed a role for CLMP in coordinated transport processes of smooth muscle cells of the intestinal and the urogenital tract. Therefore, these data may provide novel insights in the development of obstructive diseases which are caused in many cases by contractile dysfunction of smooth muscle cells (Owens et al., 2004).

## Results

### CLMP is expressed in smooth muscle cells of the intestine

Loss-of-function mutations in human patients in the *CLMP* gene indicated a function of the IgCAM CLMP in the intestinal tract (Van Der Werf et al., 2012). CLMP has previously been described as an epithelial cell adhesion protein (Raschperger et al., 2004). However, in our hands, several antibodies to CLMP were not suitable to study the localization of CLMP by immunohistology in the intestine (Supplemental Figure S1A). Therefore, initially we performed qRT-PCR of villi and the smooth muscle layer of mouse intestine. *Clmp* mRNA revealed a 4172 fold higher expression in the smooth muscle layer in comparison to villi suggesting that CLMP might exert its function in the smooth muscle layer of the intestine and not in epithelial cells of the villi (Figure 1A; Supplemental Figure S2 shows the enrichment of these tissue preparations by using cell-type specific markers in Western blotting). *In situ* hybridizations from data bases ([www.genepaint.org](http://www.genepaint.org)) which revealed *Clmp* mRNA uniformly expressed in the outer layers of intestine supported our qRT-PCR findings. Western blotting revealed two bands at 47 and 48 kDa in smooth muscle layer not detected in knockout tissue using affinity-purified antibodies to the cytoplasmic segment of mCLMP (Figure 1B). In cross sections of embryonic intestine and ureter CLMP was predominantly localized in the developing smooth muscle layer as revealed by affinity purified antibodies to the extracellular domain of CLMP (Figure S3).

### In contrast to human patients CLMP-deficient mice revealed no shortened intestine, but malrotation, decreased body weight and survival rate

To study the function of the cell adhesion protein CLMP we generated a global *Clmp* knockout mouse by deleting the start codon containing exon one of the *Clmp* gene. The correct integration of the target vector into the mouse genome was confirmed by Southern blotting and PCR (Figure S4). Absence of *Clmp* mRNA was demonstrated in brain and intestine by RT-PCR and qRT-PCR, respectively (Figure S4D and F). Western blotting revealed the absence of CLMP protein in the brain (Figure S4E), intestine (Figure 1B) and ureter (Figure 3B). The mutant mice were bred on a mixed SV129/C57BL/6 and on a C57BL/6 background. From P1 onwards the body weight of surviving *Clmp*<sup>-/-</sup> mutants increased much more slowly than that of their control littermates (Figure 1D and S5A, for examples). In addition, the survival rate of

*Clmp* knockouts drastically decreased after birth (Figure 1C and Table S1). By trend this decrease appeared more severe for CLMP-deficient mice on the C57BL/6 background than on the mixed background which, however, did not reach statistical significance. Heterozygous *Clmp* mutants of both strains did not differ in their survival rate or body weight from wild types (Figure S5B and C; Table S1). The CLMP-deficient mice that reached post-weaning stages gained body weight continuously but reached body weights of littermate controls only at mature stages (Figure S5D and E).

Loss-of-function mutations in the human *CLMP* gene correlated with a shortened intestine which causes mal-absorption of nutrients resulting in early lethality (Van Der Werf et al., 2012; Van Der Werf et al., 2015). In CLMP-deficient mice, however, the length of the intestine was not shortened at early or at mature stages. In contrast a slight but statistically significant increase in length was measured for both mutant strains when related to the total body length or body weight [Figure 1E - G for newborn pups (P0.5) and Figure S6A-C for post-weaning stages]. All compartments of the intestine were present in CLMP mutants. The overall appearance of the bowel of the mutant was indistinguishable from wild type, except for a severe dilation and for the cecum, which appeared smaller (Figure 1H and 2A-2C).

Since malrotation of the intestine - a broad term that encompasses a number of rotational and fixation abnormalities of the intestines - is another hallmark in several case reports of SBS we monitored the arrangement of the compartments of the intestine in the abdomen of CLMP-deficient mice. Several abnormalities including a mis-positioning of the cecum and the duodenum were observed at different stages of maturity in CLMP-deficient mice (Figure 1H).

### **CLMP deficient intestines revealed reduced amplitudes of pendular movements and a severe dilation**

Peristalsis is a coordinated motor behavior which enables the intestine to mix and propel its intraluminal contents to allow efficient digestion of chyme, progressive absorption of nutrients and evacuation of residues. To analyze sinusoidal oscillation (amplitude and frequency) short segments of intact duodenum or jejunum of wild type, heterozygotes or CLMP knockouts fixed with tungsten needles in an organ bath in Krebs-Ringer solution at 37°C were video imaged. To determine the movement in longitudinal and perpendicularly to the longitudinal direction bifurcation points of blood vessels on the intestine as indicated in Figure 1I were used for tracking. In duodenum a 6.5-fold (average amplitude in wild type 0.347+/-

0.033 mm and in  $-/-$  0.053  $\pm$  0.005 mm for longitudinal movements) and in the jejunum a 17-fold (average amplitude in wild type 0.549  $\pm$  0.055 mm and in  $-/-$  0.0322  $\pm$  0.005 mm) decrease was observed for the amplitude of movement in CLMP-deficient tissue if compared to wild type or heterozygous (Figure 1J, K, L, N and supplemental video S1 and S2). In contrast, the frequencies of motion in both directions were identical between genotypes (Figure 1M and 1O).

Analysis of color-coded spatial-temporal maps of gut diameter along the length of an isolated duodenal segment in an organ bath showed a severe dilated situation at zero intraluminal pressure in the knockout in comparison to wild type. The average diameter measured 0.2613 and 0.4102 mm in the wild type and in the knockout, respectively (1.6 fold increase). The change in contraction from maximum to minimum amounts to 38% and 48% of the duodenal diameter in the control and knockout, respectively (Figure 2A to C). Again, the frequency of contraction was similar between both genotypes, but knockout tissue never contracted as narrow as wild types or heterozygotes. Consistently, measurement of mechanical activity of thin ring preparations of the duodenum tied to hooks of a force transducer and set at resting tension from *Clmp*<sup>-/-</sup> mice also showed regular spontaneous contractions with a similar frequency and intensity (Figure 2D) indicating that contraction per se is not impaired in the absence of CLMP.

Taken together, our data above suggest that the decreased motility and severe dilation of the small intestine might explain the malnutrition and a severe delay to thrive of CLMP-deficient mice. Consistently, a delayed transport of milk from the stomach into and along the intestine in mutant newborn mice in comparison to wild type litters was observed. While in wild type mice milk was carried already along the intestine at P0.5, milk was transported only a short distance beyond the stomach in mutant mice (Figure 2F and images in Figure 1E). On the other hand whitely filled stomachs are detected for all inspected P0.5 and P1 mutant mice (Figure 2E and images from the gastrointestinal tract in Figure 1E) indicating that milk uptake into the stomach is normal and that a lack of suction is not the cause for the failure to thrive of CLMP-deficient mice. Furthermore, the wet weight of intestine and stomach increased by almost 50% in mature *Clmp* mutants in comparison to wild type littermates if related to the body weight. Since no further anatomical abnormality was observed in the intestine (see below) the increased wet weight might result from a loaded or rather less emptied gastrointestinal tract (Table S2).

## CLMP-deficient mice develop bilateral hydronephrosis caused by an impaired ureteral motility

In addition to the impaired intestinal motility mature CLMP-deficient mice develop severe bilateral hydronephrosis which involves dilatation and distension of the renal pelvis and calyces (Figure 3A and D). Consistently, the wet weight/body weight ratio of the kidney from mature mutants on average increased approximately 4-fold (Table S2). Hydronephrosis became already apparent at early postnatal stages, but markedly increased with age (Figure 3D). The concentrations of ions, urea, creatinine or total protein in the urine of mature CLMP-deficient mice was not altered (Figure S7A). However, Western blotting revealed an increased level of urinary NGAL (neutrophil gelatinase-associated lipocalin, also termed lipocalin2) (Mori and Nakao, 2007;Paragas et al., 2011), a marker of renal tubular injury, in CLMP-deficient mice already at early postnatal stages (Figure S7B). This suggests that hydronephrosis caused tissue damage to the renal parenchymal tissue.

Hydronephrosis might result from multiple etiological factors including physical or functional blockage in the ureteral system. On grounds of our observations on the intestine we studied a functional obstruction in the ureter by culture ureters from embryos of CLMP-deficient and wild type mice. *Clmp* mRNA is expressed in the embryonic and mature ureter and CLMP protein was detected by Western blotting in mature ureter (Figure 3B and C and Figure S3B). Ureters have been shown to exhibit peristalsis independently from the renal pelvis in culture (Cain et al., 2011). Cultured wild type embryonic ureters started unidirectionally coordinated contractions from the proximal to the distal part after four days of *ex vivo* organ culture. After five days of culture, control ureters showed approximately 0.4 contractions per minute. In contrast, CLMP-deficient ureters were completely unable to form proximal-to-distal directed peristaltic waves. Even after extended cultivation periods, ureters of *Clmp* knockout mice were not capable of developing contraction waves. In the absence of CLMP, predominantly uncoordinated, fibrillation-like movements of the ureter wall without full contractions (Figure 4A and supplemental time-lapse video S3 and S4) were detected. It is important to note that ureteral explants from *Clmp*<sup>-/-</sup> mice after five days of cultivation did not differ with respect to length from wild type and heterozygous tissue (wt, 2443 ± 125 μm (n=10); het., 2193 ± 97 μm (n=12); KO, 2451 ± 100 μm (n=13)).

To exclude any physical blockade we analyzed liquid flow from the renal pelvis to the bladder by intrapelvic ink injection experiments. In wild type and *Clmp*<sup>-/-</sup> mutants the ink easily flowed through the urinary path to the bladder, hence physical blockage along the ureter did



not contribute to the hydronephrotic phenotype in *Clmp* mutants (Figure 3E). *Clmp* knockout mice also did not reveal renal malformations or shortened ureters.

Conventional histology and immunohistochemistry indicated that the structure of the kidney as well as the overall organization of the urinary tract is not affected at early postnatal stages. Immunofluorescent stainings for smooth muscle actin, Raldh 2 or cytokeratin 8 revealed a normal layer architecture of the ureter with smooth muscle and epithelial layers in *Clmp* null ureters (Figure 3F). These data suggest that loss of the cell adhesion molecule CLMP does not lead to overall developmental deficits or to a distortion of tissue architecture in the ureter.

Thus, hydronephrosis develops in *Clmp* mutants from the functional urinary tract obstruction of urine transport in the absence of any structural abnormalities within the ureter. In this respect the ureteral defects are similar to the lack of an effective transport of chyme in the CLMP-deficient intestine. The bilateral ureteral obstruction might also contribute to a premature death of mutant mice in particular at advanced stages.

### **Calcium transients in smooth muscle cell layers of intestine and ureter are uncorrelated in the absence of CLMP**

To further understand the deficits in motility in the intestinal and ureteral system we analyzed calcium signal propagation in smooth muscle cells of ureter and intestine. Ureter explants after five days in vitro were loaded with the dye Fura-2 followed by calcium imaging. Calcium signals were measured at 50 equally spaced regions of interest (ROIs) in each explant. In wild type explants correlated calcium waves were detected whereas in mutants no coordination between calcium signals were observed. Mutant ureteral explants exhibited only few and weak calcium transients (Figure 4B to G). In duodenal strips from wild type postnatal stages highly correlated calcium transients were observed in the longitudinal smooth muscle cell layer. In contrast in CLMP deficient duodenal tissue only uncoordinated events were measured (Figure 4H to M).

### **Neurotransmission was not impaired in CLMP-deficient mice.**

Movement of intestinal contents requires contraction/relaxation of longitudinal and circular smooth muscle layers which is regulated by an interplay between the enteric neuronal network, interstitial cells of Cajal (ICC) and intrinsic mechanisms of smooth muscle cells (Bornstein et al., 2004; Farrugia, 2008; Huizinga and Lammers, 2009; Sanders, 2008). To study

the capability of the smooth muscle cells to respond to endogenously released contractile agonists we performed electric field stimulation (EFS) of ring or strip preparations of gastrointestinal tissues mounted in an organ bath. EFS elicited normal contraction in rings from duodenum or colon as well as in fundus strips from P4 *Clmp*<sup>-/-</sup> mice (Figure 5A). In addition, all three tissues contracted upon carbachol administration (1  $\mu$ mol/L) and relaxed after addition of the guanylyl cyclase activator DEA-NO, an NO donor, or the phosphodiesterase blocker IBMX demonstrating functional neurotransmission via acetylcholine receptors and NO-sensitive guanylyl cyclase.

Consistently, a severely delayed passage of meconium in the intestine was observed. While in wild types and heterozygotes it was located in the colon at embryonic day 18.5, as described by others, in mutants it reached only the ileum suggesting a failure of propulsion of the meconium (Figure 5B). This progression of contents through the embryonic gut does not require the activity of enteric neurons (Anderson et al., 2004).

Stainings of transversal duodenal sections from P0.5 mice against neurofilament, c-Kit or cytokeratin8 showed a normal overall pattern of cell layers including the localization of enteric neurons and of ICC and a normal intestine lumen diameter (Figure 5C). The latter excluded physical barriers in the intestine. In contrast, the smooth muscle cell layer of the intestine and ureter appeared in cross-sections thicker in *Clmp* mutants (Figure 7A and B) which, however, did not reach statistical significance if quantified (Figure 5D and 5E). In addition, Goblet cells that have been shown to be absent in a *clmp* Zebrafish morpholino knockdown (Van Der Werf et al., 2012) are present in CLMP knockout mice and their pattern of localization is indistinguishable from that of wild type intestines (Figure 5F).

In addition to the lack of coordinated contraction of the intestine physical barriers or other deficits in upper parts of the gastrointestinal tract might provoke a reduced transit of nutrients. For example, humans SBS is often accompanied with a hypertrophic pyloric sphincter (Van Der Werf et al., 2015;Schalamon et al., 1999) and the lower oesophageal sphincter as well as fundus might be contemplable for an impaired milk transport from the stomach into the duodenum. The composition of cellular layers in the pyloric sphincter including smooth muscle cells and c-Kit-positive cells in *Clmp* mutants were indistinguishable from wild type littermates (Supplemental Figure S8A to C). A narrowing of the pyloric opening that might impede the passage of food was not detected in longitudinal sections excluding a pyloric stenosis (Figure S8B). However, an elongated shape of the transition zone from the antrum to the duodenum (Figure S8A) was observed in the majority of preparations.

These anatomical data are in line with observations on contractions of the pyloric sphincter, fundus and the lower esophageal sphincter. Individual thin ring preparations of pyloric sphincters exhibited spontaneous rhythmic contractions when mounted in an organ bath. Spontaneous contraction frequency was not different between *Clmp*<sup>+/+</sup> and *Clmp*<sup>-/-</sup> mice but unexpectedly the maximal contraction force was significantly increased in the knockout indicating a higher muscle tone (Supplemental Figure S8D to I). Carbachol, a muscarinic agonist, was used to pre-contract fundus strips and rings of the lower oesophageal sphincter (LES). For both, the concentration response curve to the NO donator DEA-NO was shifted to higher values in *Clmp*<sup>-/-</sup> indicating a reduced sensitivity towards NO and a higher muscle tone (Supplemental Figure S8D to I). These data indicate the ability of smooth muscle cells in the gastrointestinal tract to contract; moreover they demonstrate an increased tone of gastrointestinal smooth muscle.

In summary, lack of effective chyme transport within the intestine in the absence of CLMP may originate from a peristaltic dysfunction.

### **CLMP is essential for expression of Connexin43 and 45 in the intestinal and of Connexin43 in the ureteral smooth muscle layer**

Overall, our data indicate an impaired and uncoordinated motility and cell-cell communication in the absence of CLMP in ureteral and intestinal smooth muscle cells which form a functional syncytium mainly by gap junctions to synchronize events (Maes et al., 2015). Therefore, we analyzed the pattern of expression of Connexin43 - the major Connexin in the circular muscle layer of the intestine -, Connexin45 and Connexin32 which are also expressed in the smooth muscle layer (Willecke et al., 2002) and the junctional components ZO-1 and occludin. In qRT-PCR the level of Connexin43, Connexin32, ZO-1 and occludin encoding mRNAs were not altered while that of Connexin45 was slightly reduced in the smooth muscle layer of the intestine (Figure 6A). In contrast, Western blot analysis revealed a drastically decreased level of protein expression for Connexin43 and 45 (Figure 6B-C and 6E-F). The level of protein expression in the smooth muscle cell layer of the intestine of CLMP-deficient mice reached only 15% of control levels for Connexin43 and 8% for Connexin45, respectively. Furthermore, an increased electrophoretic motility of Connexin43 was observed from CLMP-deficient in comparison to wild type tissue. Most of the protein migrated at a position that represents unphosphorylated Connexin43 (P0 form, 78%) whereas in wild type smooth muscle Connexin43 exists mainly as phosphorylated form (P1 and P2 forms, 67.8%) (Figure 6B and

6D). Phosphorylation of Connexin43 has been implicated in the regulation of gap junctional communication at different levels and in trafficking (Solan and Lampe, 2016;Falk et al., 2016;van Veen et al., 2000). Therefore, cell surface proteins were enriched from the smooth muscle layer of the intestine by the Sulfo-NHS-biotin labelling method. Western blotting revealed an expression for Connexin43 below 10% of wild type values in this fraction (Figure 6G and H). A decreased expression and phosphorylation pattern of Connexin43 was also detected for peristalsis defect ureter knock out tissue (Figure 6I and J) where the total protein level reached 5.7% of control values.

In tissue sections a strongly clustered localization of Connexin43, most likely representing membrane-localized gap junctional plaques that contain thousands of intercellular channels, was detected in wild type circular smooth muscle layer whereas in knock out tissue a severely decreased number of Connexin43 puncta were observed in intestine (Figure 7A and C) and of Connexin43 in ureter (Figure 7B). Similarly, a decrease of Connexin45 staining was observed in the smooth muscle layer of the intestine (Figure 7D and Figure S9). Electron microscopic images revealed a normal ultrastructure of smooth muscle cells but a complete absence of gap junctions in the circular smooth muscle layer of CLMP-deficient intestine. Annular gap junction vesicles representing degrading gap junctions (Falk et al., 2016) were not detected in CLMP-deficient intestine (Figure 7E).

Together, the biochemical and histological data indicated a decreased expression of Connexin43 and 45 in intestinal and ureteral knock out smooth muscle cells which in turn impaired cell-cell communication and consequently coordinated motility.

## Discussion

In the present study we observed that the homophilic IgCAM CLMP accomplishes specific functions in the peristalsis by regulating cell surface expression on smooth muscle cells of Connexin43 and 45 in the intestine and Connexin45 in the ureter. Our biochemical and histological investigations demonstrated a reduced expression of Connexin43 and 45 in CLMP-deficient smooth muscle cell layer (in the range of 10% of control values). In this regard the *Clmp* mutant might be considered as an – although incomplete - double mutant for Connexin43 and 45 in smooth muscle cells of the intestine which also might explain in part the more severe intestinal phenotype in *Clmp* mutants than that described for Connexin43 alone (Doring et al., 2007). Presence of CLMP appears to be a prerequisite for the formation of Connexin43- and/or Connexin45-containing gap junctions in intestinal and Connexin43 in ureteral smooth muscle cell layers. The level of mRNAs encoding Connexin43 is not and Connexin45 is only slightly reduced in the intestine suggesting that the turn-over rate of Connexin43 and 45 might be shifted towards an increased degradation or translational interferences might lower their expression in CLMP-deficient smooth muscle cells. Connexins in general have a very short half-life of only 1-5 hours and for Connexin43 it is well-known that phosphorylation at specific sites by kinase signaling pathways including Akt, mitogen activated protein kinase (MAPK), PKC or src controls gap junction assembly, size, disassembly and degradation (Solan and Lampe, 2014;Falk et al., 2016;Solan and Lampe, 2016).

The severe reduction of gap junctional communication by the global deletion of *Clmp* in the mouse resulted in impaired peristaltic transport processes in the intestine and ureter. Consistently, analysis of calcium transients in the smooth muscle cell layer of the ureter or intestine indicated an impaired cell-cell communication in the absence of CLMP. This cell layer of the intestine or ureter consists of smooth muscle cells in series and in parallel forming an electrical syncytium which facilitates synchronous excitation of a large number of cells to permit coordinated activity. Previously published electron microscopic investigations of the intestine revealed gap junctions between circular smooth muscle cells which are mainly composed by Connexin43 as determined by immunohistological methods (Daniel and Wang, 1999;Mikkelsen et al., 1993;Seki and Komuro, 2001;Wang and Daniel, 2001) while the intercellular communication in the longitudinal smooth muscle layer of the intestine is less understood and which might be devoid of gap junctions (Faraway et al., 1995).

The overall phenotype of *Clmp* knockout mice partly mirrors the situation in CSBS patients with mutations in the human *CLMP* gene including malnutrition, lack of gain of body

weight, intestinal malrotation and a high mortality rate at early postnatal stages. A major discrepancy between human patients and *Clmp* mouse mutants represents the length of the intestine. While in human CSBS patients the small bowel fails to elongate, CLMP-deficient mice displayed a normal length of the intestine; in fact when the body length or body weight is taken into account an even slightly longer intestine was measured. The distinction in gut length might reflect different developmental processes in the length growth of the intestine in humans and mice. For example, impaired peristaltic contractions or the gestational status has been discussed to correlate with the process of elongation in humans (Schalomon et al., 1999; Van Der Werf et al., 2015). Alternatively, compensatory mechanisms might exist in the mouse that affects the elongation of the intestine. In general, absence of CLMP appears to be more severe in humans in comparison to mice since only 22 percent of the patients survived more than one year. Shortening of the intestine might be the responsible factor for this graveness. It is highly likely that the major cause of premature death of CLMP-deficient mice is the impairment of coordinated waves of contractions in the gastrointestinal tract which are essential for an effective transport and adsorption of nutrients. We did not observe any physical obstructions. Furthermore, spontaneous as well as ligand- and EFS-induced contractions of ring preparations appeared normal in the gastrointestinal tract while the coordinated contraction of larger segments of the intestine was severely impaired which is in agreement with the observed reduced transport of milk and meconium. The increased muscle tone of pyloric tissue and the slight increase in thickness of the smooth muscle layer might be considered as a compensatory mechanism due to a failure of propulsive transport in the intestine and ureter.

In addition to the intestinal deficits CLMP-deficient mice that survived weaning age developed a severe bilateral hydronephrosis which has not been described in human CSBS patients or might have been overlooked due to their early lethality. However, recently two siblings with *CLMP* mutations have been described with intestinal dysmotility and in addition ureteropelvic junction obstruction (Alves et al., 2016). It is conceivable that this obstruction might result from impaired peristalsis of the ureter. Hydronephrosis might be caused by an impaired transport of urine from the kidney to the bladder. After filling of the renal pelvis with urine unidirectional peristaltic contractions are initiated at the renal pelvis and are propagated via the ureter, propelling urine from the pelvis of the kidney towards the urinary bladder. A failure of this action causes flow impairment leading to urinary tract dilation, hydronephrosis and finally kidney damage. Our anatomical studies as well as intrapelvic ink injections did not give evidence for physical obstructions or malformations in CLMP-deficient ureters. In contrast, our data demonstrated a functional obstruction of the ureter as found for the intestine.

Consequently, cultivations of ureters indicated an impaired peristalsis. Hydronephrosis in CLMP-deficient mice is therefore likely a secondary consequence of the lack of urine transport and back pressure from the fluid-filled ureter.

Several types of enteric neurons in the gastrointestinal tract have been detected and intestinal motility depends on the coordinated activity of peripheral neurons (Bornstein et al., 2004; Sanders, 2008). In contrast, tetrodotoxin has little effect on the peristalsis of the ureter suggesting that the peripheral nervous system plays a negligible role in maintaining pyeloureteral motility (Lang et al., 2002; Lang et al., 2001). Assuming that ureteral and intestinal malfunctions have an identical molecular basis in CLMP deficiency it is plausible to hypothesize that the impaired transport is not caused by deficits in the neuronal organization or communication in the intestine. This interpretation is also supported by our physiological and histological studies on the gastrointestinal tract that did not show any neuronal deficits. Furthermore, the failure of the meconium to pass through the intestine at late embryonic stages supports our view that a neuronal dysfunction is not implicated in the CLMP phenotype.

The intestine is an elongated tubular structure that is folded into a compact structure through the process of looping morphogenesis. All cases of CSBS were combined with a mispositioning of the intestine – termed malrotation – which was also manifested in CLMP-deficient mice (Van Der Werf et al., 2015). During embryonic development the intestine extends into the coelom of the body and returns into the abdomen accompanied by rotation. It is thought that herniation plays a role during these processes (Van Der Werf et al., 2015; Schalamon et al., 1999). Furthermore, there is evidence that the looping patterns are determined by the differential growth of the gut tube and the dorsal mesentery or by differential adhesion to asymmetric localized extracellular matrix proteins (Savin et al., 2011). The role of the cell adhesion protein CLMP in these processes remains to be determined. It is also likely that the enlarged kidneys in *Cimp* mutants might aggravate mispositioning of intestinal segments.

In sum, our study uncovered a role of CLMP in transport processes of urine to the bladder and of chyme through the gastrointestinal tract by regulating the level of Connexin43 and 45 expression in smooth muscle cells. Therefore, it is crucial for normal smooth muscle contractility. However, the detailed molecular role how CLMP affects cell surface localization of Connexin43 or 45 – either by regulating the turn-over rate, by interfering with translation or by intracellular trafficking processes - remains to be established. ZO-1 interacts with several gap junction proteins including Connexin 43 and 45 (Giepman and Moolenaar, 1998; Toyofuku et al., 1998; Laing et al., 2001; Kausalya et al., 2001) and CLMP was found to

co-localize with ZO-1 in transfected cells (Falk et al., 2016; Raschperger et al., 2004). Formation of a molecular complex between CLMP and ZO-1 and Connexin43 or Connexin45 is therefore conceivable. Our studies are in part in line with observations on the related IgCAMs CAR and BT-IgSF which might be implicated in the regulation of connexin45 or connexin43 in cardiomyocytes or Sertoli cells, respectively (Lisewski et al., 2008; Lim et al., 2008; Pelz et al., 2017). Furthermore, whether CLMP exerts its function on Connexin43 or 45 also in other cell types such as neurons or smooth muscle cells of the cardiovascular system would be an essential topic of future research. With further baseline characterization of the timing and molecular mechanisms on the progression of ureteral and intestinal defects further studies might allow to develop strategies to modulate CLMP and in turn Connexin43 and 45 activity. Overall, our data provide further insights for our understanding of obstructive diseases.



## Materials and Methods

### Generation of *Clmp* mouse mutants and genotyping

The *Clmp* target vector was generated by Vega BioLab (USA) by standard procedures replacing exon 1 of the mouse *Clmp* gene by a neomycin cassette. A thymidine cassette was inserted in the 3' homologous arm of the target vector for negative selection of ES cells. Relevant parts of the target vector were verified by sequencing. E14.1 ES cells derived from 192P2/OlaHsd were electroporated and homologous insertion was tested after digestion with *Bgl*III by Southern blotting. Positive ES cells were injected into blastocysts derived from C57BL/6 by the transgenic core facility of the MDC and chimera that transmitted the mutated *Clmp* gene were identified by mating to C57BL/6 females. Routine genotyping was performed by PCR using oligonucleotides P1 (5'-GAGAACCGTTTCGTGGAGAG-3') vs. P2 (5'-TTCAGGAGGGGCAGAATATG-3') for amplification of a 459 bp wild type fragment and P3 (5'-TCCTAAGAAGGGACGACGAG-3') vs. P4 (5'-AGCCAGTAAGCAGTGGGTTC-3') for a 428 bp knockout amplicon. Genotypes were verified by Southern blot hybridization. The mutant mice were bred on a mixed SV129/C57BL/6 background (B6;129P2-*Clmp*<sup>tm1a</sup>/Fgr) or backcrossed to a C57BL/6 background (B6.129P2-*Clmp*<sup>tm1a.1</sup>/Fgr) in which the neomycin cassette had been removed by a Cre-deleter strain (129S1-Hprt<sup>tm1(cre)</sup>/Mnn) (Schwenk et al., 1995).

The animal procedures were performed according to the guidelines from directive 2010/63/EU of the European Parliament on the protection of animals used for scientific purposes. All experiments were approved by the local authorities of Berlin (numbers T0313/97, 0143/07 and G0370/13).

### qPCR to detect *Clmp* mRNA in intestinal tissue

Total RNA from intestinal smooth muscle cell layer or villi were isolated using the RNeasy Mini Kit (Qiagen), including an on column DNase I digestion. RNA yield was measured by Nanodrop 1000 (Nanodrop). RNA was transcribed by SuperScript II (Invitrogen) using oligo dT Primers. The quantitative real time PCR was performed on a 7500 Fast Real-Time PCR System (Applied Biosystems) with GoTaq qPCR Master Mix (Promega). *Rplp0* was used as a housekeeping gene. The following primers were used: for *Clmp* (intron-flanking exon 6 and 7) forward 5'-CAGGAGCAGTGACAGGCATA-3'; *Clmp* reverse: 5'-

AGGAGCTAGGCTTCACAAGG-3'; for *Rplp0* forward: 5'-  
 GGACCCGAGAAGACCTCCTT-3'; *Rplp0* reverse: 5'-  
 GCACATCACTCAGAATTTCAATGG-3'; for *Cx43* forward:  
 GAACACGGCAAGGTGAAGAT; *Cx43* reverse: GACGTGAGAGGAAGCAGTCC; for  
*Cx45* forward: AAAGAGCAGAGCCAACCAAA; *Cx45* reverse:  
 CCCACCTCAAACACAGTCCT; for *Cx32* forward: AGGTGTGGCAGTGCCAGG; *Cx32*  
 reverse: ACCACCAGCACCATGATTCTG; *ZO-1* forward: GTTTAGGAGCACCAAGTGC;  
*ZO-1* reverse: TCCTGTACACCTTTGCTGG; for *Occludin* forward:  
 TGGCTGCTGCTGATGAATA; *Occludin* reverse: CATCCT CTTGATCTGCGATAAT. RT-  
 PCR primer for *Clmp* to detect *Clmp* encoding mRNA in ureteral tissue was: forward:  
 ATCTCACCATGGCCTCCTC; reverse: GTGCTGAGTGTGGTTTCTGC. As control served:  
*Actb* forward: CGTGGGCCGCCCTAG; *Actb* reverse: CTTAGGGTTCAGGGGGGC.

## Biochemical methods

Determination of ions (sodium, potassium, calcium, chloride, and magnesium), glucose, urea, creatinine or total protein in urine from adult wild type or *Clmp* mutants (mixed background) was performed by Labor28 (Berlin, Germany). SDS-PAGE and Western blotting of urine was done according to standard procedures under non-reducing conditions with a goat-anti-NGAL antibody (R&D Systems #AF1857, 1:1000). To detect CLMP in brain tissue, membranes enriched by centrifugational forces were solubilized with 1% CHAPS in PBS supplemented with protease blockers (aprotinin, PMSF, leupeptin, pepstatin). Membrane proteins of smooth muscle cell layer were solubilized in 1% SDS in Tris buffered saline, pH 7.4, and protease blockers. Insoluble material was removed by centrifugation at 100 000g. For cell surface labeling the smooth muscle cell layer was peeled off from enteric tissue in PBS. Labeling was done with 2 mM Sulfo-NHS-LC-Biotin (Sulfosuccinimidyl-6-(biotinamido) Hexanoate; Thermo Scientific, #21335) in PBS at 4°C for one hour followed by quenching with 100 mM Glycine in PBS and several washing steps. Proteins were extracted in 1% SDS in Tris buffered saline (pH 7.0) supplemented with protease blockers and non-solubilized components were removed by centrifugation at 100 000 g for 10 minutes. Biotinylated proteins were then enriched using streptavidin agarose resin (Thermo Scientific). Bound proteins were eluted by SDS PAGE sample buffer. The following antibodies were used for Western blotting: rabbit anti-Connexin43 (Cell Signaling #3512, 1:1000), rabbit anti-Pan-Cadherin (Sigma # C3678, 1:1000), rabbit anti-Connexin45 (abcam # AB16588, 1:1000), mAb

anti-GAPDH (Novus Biologicals # NB300-221, 1:7500), mAb anti-clathrin heavy chain (BD Transduction Laboratories #610499, 0.1µg/ml), mAb anti-caveolin (Transduction Laboratories, 0.1 µg/ml), rabbit 6504 (0.5 µg/ml) and mAb anti-smooth muscle actin (Sigma, clone 1A4 # A5228, 0.1µg/ml). Binding of antibodies or streptavidin-HRP (Sigma, 0.1 µg/ml) was obtained by Clarity Western ECL solution (Bio-Rad) and Chemi-Doc imager (Bio-Rad). Image processing and analyses of Western blots of Cx43 were carried out using custom-written scripts for Fiji (<http://rsbweb.nih.gov/ij/>) or Qunatity One (Bio-Rad). Mean grey values of bands of phosphorylated, non-phosphorylated and total Cx43 were calculated from rectangular areas (Schindelin et al., 2012).

For the preparation of villi intestinal segments were cut open and villi were scrapped off by a brush in 5 mM EDTA/PBS and collected by centrifugation.

### **Generation of antibodies to CLMP**

Rabbit antibodies to murine CLMP were raised against a fusion protein composed of the extracellular region of mouse CLMP (aa residues 18 to 232) using vector pIg-plus and the heavy chain of human IgG1 (rabbit 101 and 102) or raised against the cytoplasmic segment obtained from a bacterial fusion protein containing GST and the cytoplasmic segment of mouse CLMP (aa residues 256 to 373) using vector pGEX-6P1 (GE Healthcare) (rabbit 6504). After removal of the GST portion the cytoplasmic segment was further purified by ion exchange chromatography. The fusion proteins containing the extracellular domain of CLMP were generated in COS7 cells and purified by ProteinA affinity chromatography (GE Healthcare). Rabbits were injected five times with 50 µg each supplemented with Freund's adjuvant (Sigma) at fortnightly intervals. The IgG fractions were isolated by ProteinA affinity chromatography (GE Healthcare). The IgG fractions of rabbit 6504 or rabbit 102 were further affinity purified on columns containing the cytoplasmic segment of CLMP or the extracellular domain coupled to CNBr-activated Sepharose 4B (GE Healthcare), respectively.

### **Immunohistology**

Immunohistochemistry was performed on 4 % paraformaldehyde-fixed 15 µm cryostat sections of tissue from the urinary and gastrointestinal tract using the following antibodies: mouse anti-neurofilament (Developmental Hybridoma Bank #2H3, 1:200), mouse anti-smooth muscle actin ( $\alpha$ SMA; Sigma #A5228; 5 µg/ml), rat anti-cytokeratin 8 (Developmental Hybridoma

Bank #TROMA-I concentrate, 1:700), rabbit anti-Connexin43 (Cell Signaling, #3512, 1:200), rabbit anti-Connexin45 (Millipore #AB1745, 1:100), sheep anti-Connexin45 (Abcam, #ab16588, 1:1000), rat anti-c-kit (bioscience CD117, mACK2, 1:1000), rabbit anti-ASAM (Biorbyt #orb100510), rabbit anti-CLMP (Sigma #HPA002385, 1:100), mouse anti-Mucin2 (F-2, #sc-515032, 1 µg/ml), rabbit 102AP (0.5 µg/ml) and rabbit anti-ALDH1A2 (Abcam, #ab75674, 1:500). In addition to a standard staining procedure a heat induced antigen retrieval protocol was used to detect CLMP. Cell nuclei were stained by DAPI. Monoclonal antibodies and corresponding secondary antibodies were incubated on sections using the MOM kit (Vector Laboratories, BMK-2202).

Glycol methacrylate sections (5 µm) of urinary or gastrointestinal tract were performed for HE-staining. All microscopic images were obtained at room temperature using an inverted LSM710 confocal microscope and ZEN acquisition software (Zeiss) or Biozero BZ-8100 microscope and BZ Analyzer software.

Analysis of Connexin clusters detected by anti-Connexin antibodies in confocal images of cryostat sections were done by Fiji software setting the threshold to *RenyiEntropy* routine, clusters were accepted between 0.05 - 1.00 µm<sup>2</sup> (2-40 pixel) in the smooth muscle cell layer within the view field of 160.04 x 160.04 µm<sup>2</sup>.

### **Electron microscopy**

Pieces of duodenum from 4 week old wildtype or CAR-deficient mice were fixed in 4% formaldehyde/3% glutaraldehyde in 0.1 M cacodylate buffer overnight and post-fixed with 1% osmium tetroxide for 3 hours according to (Komuro, 1989). After osmication, specimen were rinsed in distilled water and block stained with 5 % uranyl acetate in distilled water for 3 hours, dehydrated through a graded series of ethanol and embedded in Poly/Bed 812 (Polysciences, Inc., Eppelheim, Germany). Ultrathin sections were stained with uranyl acetate and lead citrate and examined with a FEI Morgagni electron microscope and the iTEM software (EMSIS GmbH, Münster, Germany).

## **Ureter explant cultures, time lapse recordings of ureter, intrapelvic ink injections and analysis of gastrointestinal milk**

Ureters from E15.5 embryos were cultured and imaged at the air-liquid interface on PET filter membranes (0.4  $\mu\text{m}$  pore size, BD Falcon) containing DMEM/Ham's F12+GlutaMAX supplemented with 5 $\mu\text{g/ml}$  transferrin, 100  $\mu\text{g/ml}$  penicillin, and 100 U/ml streptomycin at 37 °C in an atmosphere of 5% CO<sub>2</sub> as detailed by (Cain et al., 2011). Time lapse recordings were done at DIV 5 using an inverted LSM 710 confocal microscope (Zeiss) equipped with temperature and CO<sub>2</sub> controller. Time-lapse images of ureters were acquired every 270 ms for a total duration of 20 minutes. Peristalsis was then quantified by measuring the lumen diameter at fixed points throughout the contraction period.

Intrapelvic ink (12.5% in H<sub>2</sub>O; Pelikan) injections were done in E18.5 embryos with pulled glass pipettes using a micromanipulator and a Cell Tram oil injector (Eppendorf) (Cain et al., 2011). The analysis of transport of milk in the gastrointestinal tract of P0.5 mice was done from photographic images processed in Image J (NIH).

## **Image acquisition of the contraction activity of the duodenum, jejunum or colon and calculation of spatiotemporal maps**

The duodenum, jejunum or colon from wild-type, heterozygotes or *Clmp*<sup>-/-</sup> mice at P40 - 44 killed by cervical dislocation was rapidly removed and placed an organ bath at 37 °C superfused with Krebs solution and bubbled with 95% O<sub>2</sub> -5% CO<sub>2</sub> (Swaminathan et al., 2016). The segments were secured at both ends. Motility pattern of single points of isolated segments of the duodenum and jejunum in longitudinal and transversal axis were quantified at specified positions via a method developed similarly to Lentle et al. (2007). Images of 540x540 pixels were captured subsequently from an on screen recording of live mode microscopy (Zeiss Stemi SV11, Camera Zeiss AxioCam HRc) at rate of 25 frames/second. An algorithm written in MATLAB was applied to consecutive frames employing normalized cross correlation to track the displacement of a 35x35 pixel square (0,73x0,73 mm) enclosing a unique pattern of vascular arcade on the serosal surface. The coordinates of square's position in each frame was attained given the maximum value of normalized cross correlation coefficient (roughly 1) and saved in an array for further analysis. The obtained coordinates were plotted individually in either horizontal or vertical axis over time giving the motility pattern of the intestinal segment

at that specific point of interest in horizontal and vertical planes. The average amplitude and frequency of the movements were estimated consequently from these motility graphs (Lentle et al., 2007).

For spatio-temporal maps movements of intestinal segments were recorded as video files in mp4 format using a video camera (SJCAM SJ5000, 30 frames/sec, 1920 x 1080 pixels). The image processing, analysis, visualization, and algorithm development for generation of spatiotemporal maps were all proceeded in MatLab (2016a) in accordance to the Bernard T. et al.'s approach (Benard et al., 1997).

### **Isometric force studies**

Fundus, lower esophagus sphincter (LES) and pyloric sphincter (PS) were transferred to Krebs-Henseleit solution bubbled with 95% O<sub>2</sub> and 5% CO<sub>2</sub>. Fundus strips were mounted longitudinally on fixed segment support pins in two four-chamber myographs (Myograph 610; Danish Myo Technology, Aarhus, Denmark) containing 5 ml of the Krebs–Henseleit solution. Resting tension was set to 3 mN. Strips were precontracted with carbachol (CCh; 0.1 μmol/L). Relaxation was induced with DEA-NO as indicated. IBMX (100 μmol/L) was added at the end of each experiment to determine maximal relaxation. LES was fixed as rings on segment support pins to measure circular muscle tension. Resting tension was set to 2 mN. The strips were contracted with CCh (1 μmol/L) and, subsequently, DEA-NO was applied as indicated. Rings of the pyloric sphincter (PS) were fixed on segment support pins to measure phasic contractions of circular muscle. Maximal contractile force of each sphincter was determined from recordings over 30 min (Groneberg et al., 2015;Groneberg et al., 2011).

### **Electric field stimulation and calcium imaging**

Fundus strips as well as rings from duodenum and colon were mounted and the resting tension was set to 1 mN. Electric field stimulation (EFS; 0.5 ms, 1-8 Hz, 10 s, supramaximal voltage) was applied through two platinum wire electrodes (5 mm distance).

Changes in intracellular Ca<sup>2+</sup>-concentrations were recorded in cultured ureter loaded with the Ca<sup>2+</sup>-indicator fura-2 for one hour as described (Unsoeld et al., 2008). Duodenum was cut open, the villi containing side was put down and for calcium imaging strips were secured at several points with tungsten needles.

## Statistics

Numerical data are presented as means  $\pm$  SEM or as  $\pm$  SD (qRT-PCR). Data were analysed by SigmaStat (V11.0, Systat Software, Inc.). Data were first analyzed by the Kolmogorov-Smirnov test whether they are normally distributed followed by analysis of significance using Mann-Whitney-*U* test or by a *t*-test. Isometric force studies were analyzed by the Mann-Whitney-*U* test using GraphPad Prism software version 4.00 (GraphPad Software (San Diego, California, USA). The survival rates of CLMP-deficient mice on the mixed and C57Bl/6 genetic background were compared using the Log-Rank-Test, Breslow-Test and Tarone-Ware-Test. Significance levels were indicated as \*  $P \leq 0.05$ , \*\*  $P \leq 0.01$  or \*\*\*  $P \leq 0.001$ .

## **Acknowledgements**

We thank Mechthild Henning, Anne Banerjee, Christina Schiel and Karola Bach for technical help, and acknowledge the support of the microscopic facility of the Max-Delbrück-Center. We thank Drs Norbert Hübner and Michael Gotthardt (both MDC) for discussions, Dr Rainer Kabisch and Dr Ralf Kühn of the transgenic core facility of the MDC for blastocyst injections and Dr Christina Eichhorn (MDC) for the statistical evaluations of our data. This work was supported by a PhD stipend of the international PhD program of the MDC and the Sonnenfeld-Stiftung to HL, by DFG grants to KMSO, by a DFG grant FR 1725/5-1 to AF and by a MDC grant to FGR. KMSO is supported by the Urological Research Foundation (Stiftung Urologische Forschung).

## **Author contributions:**

HL, DG, RJ, LP, BP and FGR performed experiments, AM computed recordings. FGR, HL, DG, RJ, AF, LP and KMSO designed experiments and analyzed data, FGR, AF, KMSO and HL wrote the manuscript.

## **Competing interests:**

No competing interests declared



## References

- Alves, M.M., D.Halim, R.Marroofian, B.M.de Graaf, R.Rooman, C.S.Van Der Werf, d.Van, V, M.Y.Mehrjardi, M.Aflatoonian, B.A.Chioza, E.L.Baple, M.Dezhghani, A.H.Crosby, and R.M.Hofstra. 2016. Genetic screening of Congenital Short Bowel Syndrome patients confirms CLMP as the major gene involved in the recessive form of this disorder. *Eur. J. Hum. Genet.*
- Anderson, R.B., H.Enomoto, J.C.Bornstein, and H.M.Young. 2004. The enteric nervous system is not essential for the propulsion of gut contents in fetal mice. *Gut* 53:1546-1547.
- Benard, T., M.Bouchoucha, M.Dupres, and P.H.Cugnenc. 1997. In vitro analysis of rat intestinal wall movements at rest and during propagated contraction: a new method. *Am. J. Physiol* 273:G776-G784.
- Bornstein, J.C., M.Costa, and J.R.Grider. 2004. Enteric motor and interneuronal circuits controlling motility. *Neurogastroenterol. Motil.* 16 Suppl 1:34-38.
- Bush, K.T., D.A.Vaughn, X.Li, M.G.Rosenfeld, D.W.Rose, S.A.Mendoza, and S.K.Nigam. 2006. Development and differentiation of the ureteric bud into the ureter in the absence of a kidney collecting system. *Dev. Biol.* 298:571-584.
- Cain, J.E., E.Islam, F.Haxho, J.Blake, and N.D.Rosenblum. 2011. GLI3 repressor controls functional development of the mouse ureter. *J Clin. Invest* 121:1199-1206.
- Daniel, E.E., and Y.F.Wang. 1999. Gap junctions in intestinal smooth muscle and interstitial cells of Cajal. *Microsc. Res. Tech.* 47:309-320.

Doring, B., G.Pfitzer, B.Adam, T.Liebregts, D.Eckardt, G.Holtmann, F.Hofmann, S.Feil, R.Feil, and K.Willecke. 2007. Ablation of connexin43 in smooth muscle cells of the mouse intestine: functional insights into physiology and morphology. *Cell Tissue Res.* 327:333-342.

Eguchi, J., J.Wada, K.Hida, H.Zhang, T.Matsuoka, M.Baba, I.Hashimoto, K.Shikata, N.Ogawa, and H.Makino. 2005. Identification of adipocyte adhesion molecule (ACAM), a novel CTX gene family, implicated in adipocyte maturation and development of obesity. *Biochem. J.* 387:343-353.

Falk, M.M., C.L.Bell, R.M.Kells Andrews, and S.A.Murray. 2016. Molecular mechanisms regulating formation, trafficking and processing of annular gap junctions. *BMC. Cell Biol.* 17 Suppl 1:22.

Farraway, L., A.K.Ball, and J.D.Huizinga. 1995. Intercellular metabolic coupling in canine colon musculature. *Am. J. Physiol* 268:C1492-C1502.

Farrugia, G. 2008. Interstitial cells of Cajal in health and disease. *Neurogastroenterol. Motil.* 20 Suppl 1:54-63.

Giepmans, B.N., and W.H.Moolenaar. 1998. The gap junction protein connexin43 interacts with the second PDZ domain of the zona occludens-1 protein. *Curr. Biol.* 8:931-934.

Gonnaud, L., M.M.Alves, C.Cremillieux, K.Billiemaaz, S.Destombe, F.Varlet, M.Lopez, L.Trapes, R.Touraine, R.M.Hofstra, and H.Patural. 2016. Two new mutations of the CLMP gene identified in a newborn presenting congenital short-bowel syndrome. *Clin. Res. Hepatol. Gastroenterol.* 40:e65-e67.

Groneberg, D., P.Konig, D.Koesling, and A.Friebe. 2011. Nitric oxide-sensitive guanylyl cyclase is dispensable for nitrergic signaling and gut motility in mouse intestinal smooth muscle. *Gastroenterology* 140:1608-1617.

Groneberg, D., E.Zizer, B.Lies, B.Seidler, D.Saur, M.Wagner, and A.Friebe. 2015. Dominant role of interstitial cells of Cajal in nitrergic relaxation of murine lower oesophageal sphincter. *J. Physiol* 593:403-414.

Hamilton, J.R., B.J.Reilly, and R.Morecki. 1969. Short small intestine associated with malrotation: a newly described congenital cause of intestinal malabsorption. *Gastroenterology* 56:124-136.

Huizinga, J.D., and W.J.Lammers. 2009. Gut peristalsis is governed by a multitude of cooperating mechanisms. *Am. J. Physiol Gastrointest. Liver Physiol* 296:G1-G8.

Kausalya, P.J., M.Reichert, and W.Hunziker. 2001. Connexin45 directly binds to ZO-1 and localizes to the tight junction region in epithelial MDCK cells. *FEBS Lett.* 505:92-96.

Komuro, T. 1989. Three-dimensional observation of the fibroblast-like cells associated with the rat myenteric plexus, with special reference to the interstitial cells of Cajal. *Cell Tissue Res.* 255:343-351.

Laing, J.G., R.N.Manley-Markowski, M.Koval, R.Civitelli, and T.H.Steinberg. 2001. Connexin45 interacts with zonula occludens-1 and connexin43 in osteoblastic cells. *J. Biol. Chem.* 276:23051-23055.

Lang, R.J., M.E.Davidson, and B.Exintaris. 2002. Pyeloureteral motility and ureteral peristalsis: essential role of sensory nerves and endogenous prostaglandins. *Exp. Physiol* 87:129-146.

Lang, R.J., H.Takano, M.E.Davidson, H.Suzuki, and M.F.Klemm. 2001. Characterization of the spontaneous electrical and contractile activity of smooth muscle cells in the rat upper urinary tract. *J. Urol.* 166:329-334.

Lentle, R.G., P.W.Janssen, P.Asvarujanon, P.Chambers, K.J.Stafford, and Y.Hemar. 2007. High definition mapping of circular and longitudinal motility in the terminal ileum of the brushtail possum *Trichosurus vulpecula* with watery and viscous perfusates. *J. Comp Physiol B* 177:543-556.

Lim, B.K., D.Xiong, A.Dorner, T.J.Youn, A.Yung, T.I.Liu, Y.Gu, N.D.Dalton, A.T.Wright, S.M.Evans, J.Chen, K.L.Peterson, A.D.McCulloch, T.Yajima, and K.U.Knowlton. 2008. Coxsackievirus and adenovirus receptor (CAR) mediates atrioventricular-node function and connexin 45 localization in the murine heart. *J. Clin. Invest* 118:2758-2770.

Lisewski, U., Y.Shi, U.Wrackmeyer, R.Fischer, C.Chen, A.Schirdewan, R.Juttner, F.Rathjen, W.Poller, M.H.Radke, and M.Gotthardt. 2008. The tight junction protein CAR regulates cardiac conduction and cell-cell communication. *J. Exp. Med.* 205:2369-2379.

Maes, M., Y.S.Crespo, J.Willebrords, B.Cogliati, and M.Vinken. 2015. Connexin and pannexin signaling in gastrointestinal and liver disease. *Transl. Res.* 166:332-343.

Mikkelsen, H.B., J.D.Huizinga, L.Thuneberg, and J.J.Rumessen. 1993. Immunohistochemical localization of a gap junction protein (connexin43) in the muscularis externa of murine, canine, and human intestine. *Cell Tissue Res.* 274:249-256.

Mori, K., and K.Nakao. 2007. Neutrophil gelatinase-associated lipocalin as the real-time indicator of active kidney damage. *Kidney Int.* 71:967-970.

Murakami, K., J.Eguchi, K.Hida, A.Nakatsuka, A.Katayama, M.Sakurai, H.Choshi, M.Furutani, D.Ogawa, K.Takei, F.Otsuka, and J.Wada. 2016. The anti-obesity action of ACAM by modulating the dynamics of cell adhesion and actin polymerization in adipocytes. *Diabetes.*

Owens, G.K., M.S.Kumar, and B.R.Wamhoff. 2004. Molecular regulation of vascular smooth muscle cell differentiation in development and disease. *Physiol Rev.* 84:767-801.

Paragas, N., A.Qiu, Q.Zhang, B.Samstein, S.X.Deng, K.M.Schmidt-Ott, M.Viltard, W.Yu, C.S.Forster, G.Gong, Y.Liu, R.Kulkarni, K.Mori, A.Kalandadze, A.J.Ratner, P.Devarajan, D.W.Landry, V.D'Agati, C.S.Lin, and J.Barasch. 2011. The Ngal reporter mouse detects the response of the kidney to injury in real time. *Nat. Med.* 17:216-222.

Pelz, L., B.Purfurst, and F.G.Rathjen. 2017. The cell adhesion molecule BT-IgSF is essential for a functional blood-testis barrier and male fertility in mice. *J. Biol. Chem.*

Raschperger, E., U.Engstrom, R.F.Pettersson, and J.Fuxe. 2004. CLMP, a novel member of the CTX family and a new component of epithelial tight junctions. *J. Biol. Chem.* 279:796-804.

Sanders, K.M. 2008. Regulation of smooth muscle excitation and contraction. *Neurogastroenterol. Motil.* 20 Suppl 1:39-53.

Savin, T., N.A.Kurpios, A.E.Shyer, P.Florescu, H.Liang, L.Mahadevan, and C.J.Tabin. 2011. On the growth and form of the gut. *Nature* 476:57-62.

Schalamon, J., P.H.Schober, P.Gallippi, L.Matthyssens, and M.E.Hollwarth. 1999. Congenital short-bowel; a case study and review of the literature. *Eur. J. Pediatr. Surg.* 9:248-250.

Schindelin, J., I.Arganda-Carreras, E.Frise, V.Kaynig, M.Longair, T.Pietzsch, S.Preibisch, C.Rueden, S.Saalfeld, B.Schmid, J.Y.Tinevez, D.J.White, V.Hartenstein, K.Eliceiri, P.Tomancak, and A.Cardona. 2012. Fiji: an open-source platform for biological-image analysis. *Nat. Methods* 9:676-682.

Schwenk, F., U. Baron, and K. Rajewsky. 1995. A cre-transgenic mouse strain for the ubiquitous deletion of loxP-flanked gene segments including deletion in germ cells. *Nucleic Acids Res.* 23:5080-5081.

Seki, K., and T. Komuro. 2001. Immunocytochemical demonstration of the gap junction proteins connexin 43 and connexin 45 in the musculature of the rat small intestine. *Cell Tissue Res.* 306:417-422.

Solan, J.L., and P.D. Lampe. 2014. Specific Cx43 phosphorylation events regulate gap junction turnover in vivo. *FEBS Lett.* 588:1423-1429.

Solan, J.L., and P.D. Lampe. 2016. Kinase programs spatiotemporally regulate gap junction assembly and disassembly: Effects on wound repair. *Semin. Cell Dev. Biol.* 50:40-48.

Swaminathan, M., E. Hill-Yardin, M. Ellis, M. Zygorodimos, L.A. Johnston, R.M. Gwynne, and J.C. Bornstein. 2016. Video Imaging and Spatiotemporal Maps to Analyze Gastrointestinal Motility in Mice. *J. Vis. Exp.*

Toyofuku, T., M. Yabuki, K. Otsu, T. Kuzuya, M. Hori, and M. Tada. 1998. Direct association of the gap junction protein connexin-43 with ZO-1 in cardiac myocytes. *J. Biol. Chem.* 273:12725-12731.

Unsoeld, T., A.M. Stradomska, R. Wang, F.G. Rathjen, and R. Jüttner. 2008. Early maturation of GABAergic synapses in mouse retinal ganglion cells. *Int. J. Dev. Neurosci.* 26:233-238.

Van Der Werf, C.S., D. Halim, J.B. Verheij, M.M. Alves, and R.M. Hofstra. 2015. Congenital Short Bowel Syndrome: from clinical and genetic diagnosis to the molecular mechanisms involved in intestinal elongation. *Biochim. Biophys. Acta* 1852:2352-2361.

Van Der Werf, C.S., N.H.Hsiao, S.Conroy, J.Paredes, A.S.Ribeiro, Y.Sribudiani, R.Seruca, R.M.Hofstra, H.Westers, and S.C.van Ijzendoorn. 2013. CLMP is essential for intestinal development, but does not play a key role in cellular processes involved in intestinal epithelial development. *PLoS. One.* 8:e54649.

Van Der Werf, C.S., T.D.Wabbersen, N.H.Hsiao, J.Paredes, H.C.Etchevers, P.M.Kroisel, D.Tibboel, C.Babarit, R.A.Schreiber, E.J.Hoffenberg, M.Vekemans, S.L.Zeder, I.Ceccherini, S.Lyonnet, A.S.Ribeiro, R.Seruca, G.J.Te Meerman, S.C.van Ijzendoorn, I.T.Shepherd, J.B.Verheij, and R.M.Hofstra. 2012. CLMP is required for intestinal development, and loss-of-function mutations cause congenital short-bowel syndrome. *Gastroenterology* 142:453-462.

van Veen, T.A., H.V.van Rijen, and H.J.Jongsma. 2000. Electrical conductance of mouse connexin45 gap junction channels is modulated by phosphorylation. *Cardiovasc. Res.* 46:496-510.

Wang, Y.F., and E.E.Daniel. 2001. Gap junctions in gastrointestinal muscle contain multiple connexins. *Am. J. Physiol Gastrointest. Liver Physiol* 281:G533-G543.

Willecke, K., J.Eiberger, J.Degen, D.Eckardt, A.Romualdi, M.Guldenagel, U.Deutsch, and G.Sohl. 2002. Structural and functional diversity of connexin genes in the mouse and human genome. *Biol. Chem.* 383:725-737.

## **Abbreviations**

ACAM – adipocyte adhesion molecule

CLMP – CAR-like membrane protein

CSBS – congenital short-bowel syndrome

EFS – electric field stimulation

ICC – interstitial cells of Cajal

IgCAM – Ig cell adhesion molecule

LES – lower esophageal sphincter

NO – nitric oxid

ZO-1 – zonula occludens-1 protein



## Figures

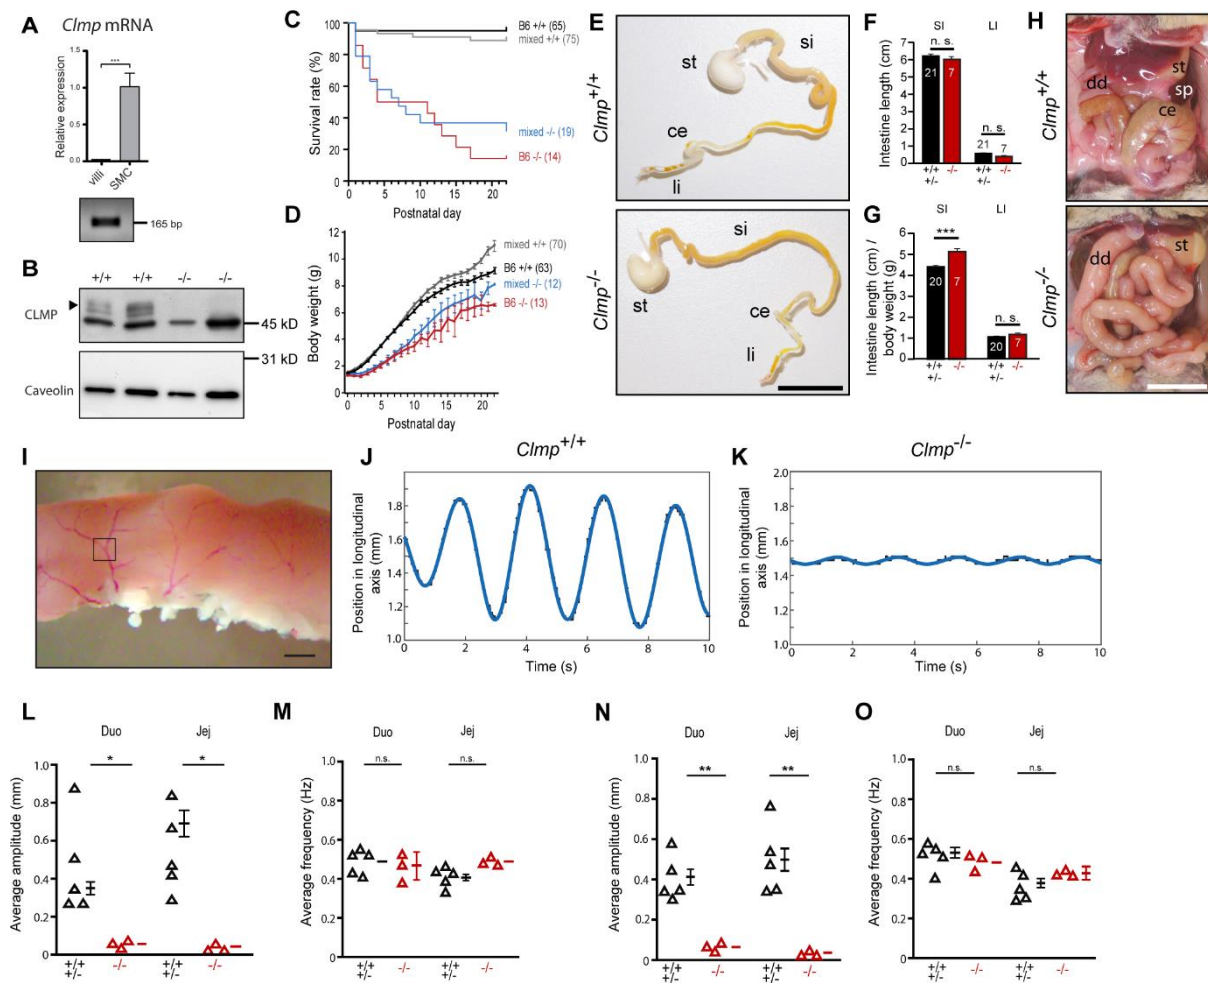

**Figure 1**

### High mortality and impaired body growth of *Clmp*-deficient mice are caused by intestinal peristalsis deficits

A) A *Clmp* transcript is expressed in intestinal smooth muscle cell layer but not in the villi. qRT-PCR from villi and smooth muscle cells and its amplification product are shown. (Data are shown as mean  $\pm$ SD, t-test,  $p=0.0007$ ,  $n=3$  per genotype).

B) Bands at 47 and 48 kDa are specifically detected by Western blotting by an antibody to the cytoplasmic segment of mCLMP in crude membrane fractions of wild type but not in knockout smooth muscle cell layer (4 weeks old). An unspecific band at 44 kDa is observed in both genotypes.

C) CLMP-deficient animals (blue, mixed genetic background; red, B6 genetic background) exhibit early postnatal lethality in comparison to control littermates (pooled data of wild type and heterozygous mice; gray, mixed genetic background; black, B6 genetic background). Numbers in brackets indicate numbers of inspected animals. No statistical significance was observed when the survival rates of knockouts between B6 and mixed genetic background were compared (Log-Rank-Test, Breslow-Test or Tarone-Ware-Test).

D) *Clmp* knockout pups have a delayed body growth. See (C) for color information. Body weight values in grams are shown as mean  $\pm$  SEM.

E) Dissected gastrointestinal tracts from newborn (P0.5) mice. Note that stomachs of both genotypes are filled with milk, and only the wild type gut but not the mutant gut contains milk as detected by the white color (see also Figure 2F). si, small intestine; li, large intestine; st, stomach; ce, cecum. Scale bar, 1 cm.

F and G) Length of the small (si) and large intestine (li) of P0.5 CLMP-deficient pups (B6 genetic background) were comparable to wild type littermates but the length of the small intestine is increased when body weight is taken into account. Length of guts from adult mice are given Figure S6.

H) Loss of CLMP results in a mispositioning of the intestine in the mature (P40) mouse abdomen. st, stomach; dd, duodenum; ce, cecum; sp, spleen. Scale bar, 1 cm. (5 wild types and 4 knockouts at P40 to P45 and 2 wild types and 3 knockouts at P26-28 were inspected).

I) Microscopic image of a duodenal segment in an organ bath. The square indicates a branching point of a blood vessel on the intestine which was used to track intestinal displacements. Scale bar, 1 mm.

J and K) Examples of the amplitude of longitudinal movements of wild type and CLMP-deficient duodenal segments are shown. Please view videos 1 and 2 available as supplemental information.

L and M) Amplitude and frequency of longitudinal movements of the duodenum (Duo) and jejunum (Jej) in an organ bath are shown.

N and O) Amplitude and frequency of movements perpendicular to the longitudinal direction of the duodenum and jejunum in an organ bath are shown.

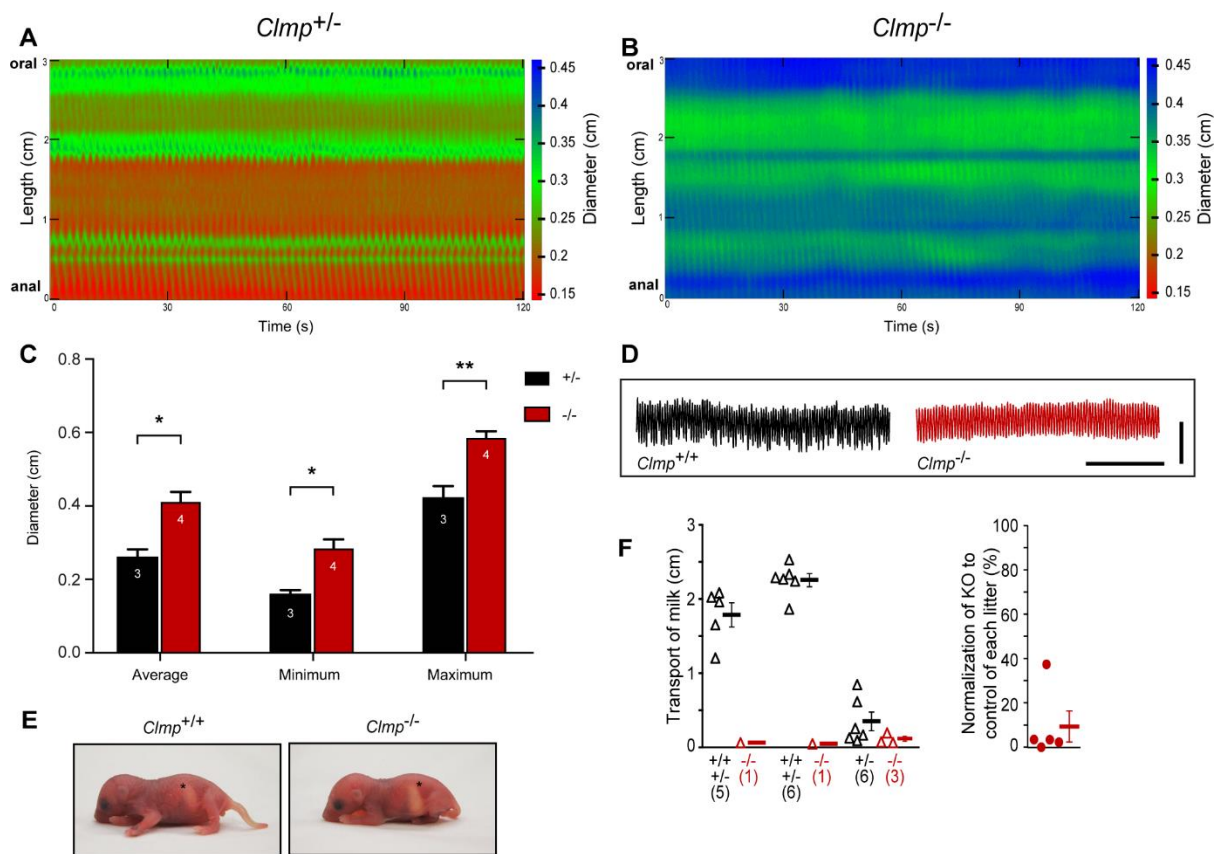

**Figure 2**

**A severely dilated small intestine resulting in impaired transport of chyme in the absence of CLMP.**

A and B) Spatiotemporal maps of contractile activity in heterozygote and CLMP-deficient duodenum without intraluminal pressure are shown. The diameter of the intestine is expressed in cm in pseudo-color as indicated on the right of each panel (n=4 knockouts; n=5 heterozygotes or wild type inspected; P42 to P48).

C) Summary of duodenum diameter in the organ bath. Numbers in the columns indicate number of specimens analyzed.

D) Spontaneous contractility of ring preparations of the duodenum from P2 wild type (left trace) and *Clmp* mutant (right trace) mice in an organ bath set at resting tension of 1 mN. Similar results were obtained with tissue from P4 mice. Horizontal scale bar, 1 min; vertical scale bar 0.5 mN.

E) CLMP-deficient neonates at P1.5 display a stomach filled with milk comparable to wild type controls. Stomachs are marked by asterisks. (Numbers of animals inspected: wild type: 6, heterozygote: 15, knockout: 7).

F) Distance of milk transport from the pylorus along the gut in P0.5 knockout and control littermates. Values of three litters are presented. (Litter 3 represents most likely pups that had just started to take up milk from the mother as deduced from the wild types. In wild types milk is not or only a short distance transported whereas in mutants no transport was detected as in knockouts from litters 1 and 2). Numbers in brackets indicate numbers of analyzed animals. In the right graph values were normalized to control littermates. Controls were set as 100%. See also Figure 1E on milk transport in the intestine.

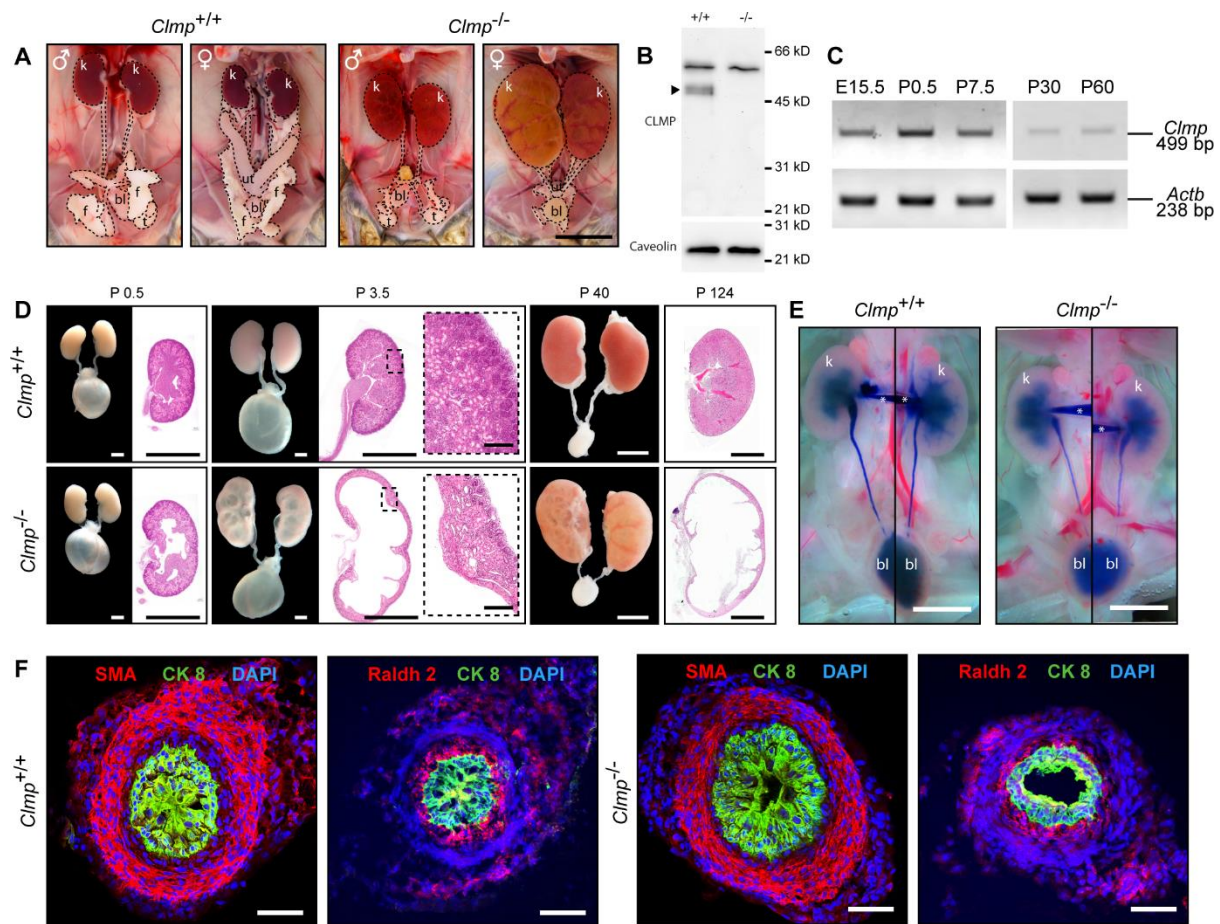

**Figure 3**  
**Bilateral hydronephrosis in the absence of CLMP**

A) Severe degrees of bilateral hydronephrosis and hypomorphic reproductive tracts can be observed in P40 old homozygous mutant mice of both genders (mixed genetic background). bl – urinary bladder; f – fat; k – kidney; u – uterus; t – testes; Scale bar, 1 cm.

B) Absence of CLMP in crude membrane fractions from ureter tissue of 12-weeks-old mice. CLMP was detected as doublet at 47 and 48 kDa using antibody 6504 to the cytoplasmic domain of CLMP. An unspecific band at 60 kDa is observed in both genotypes. Caveolin served as loading control (lower panel). Molecular mass markers are given at the right of the panels. Tissues from 5 animals of each genotype were pooled.

C) RT-PCR to detect *Clmp* encoding mRNA in ureteral tissue at different stages. *Actb* served as control (lower panel).

D) Bilateral hydronephrosis develops perinatally and aggravates rapidly by dilation of the renal pelvis and loss of renal parenchyma. Whole mount preparations and HE stained glycol methacrylate sections are shown. Scale bars P0.5 and P3.5, 1 mm; enlarged image of P3.5, 100  $\mu$ m; scale bars of P40 and P124, 5 mm.

E) Intrapelvic ink injections demonstrated absence of physical obstructions in E18 wild type (left image) and *Clmp* knockout (right image) urinary systems. \* denotes the pulled micropipette. Scale bars, 2 mm.

F) Immunofluorescent stainings with smooth muscle marker  $\alpha$ -SMA, urothelial marker cytokeratin 8 (CK 8) and the ureteral stromal marker retinaldehyde dehydrogenase (Raldh2) show normal structure of ureteral cell layers in CLMP-deficient P1.5 mice. Scale bars, 50  $\mu$ m.

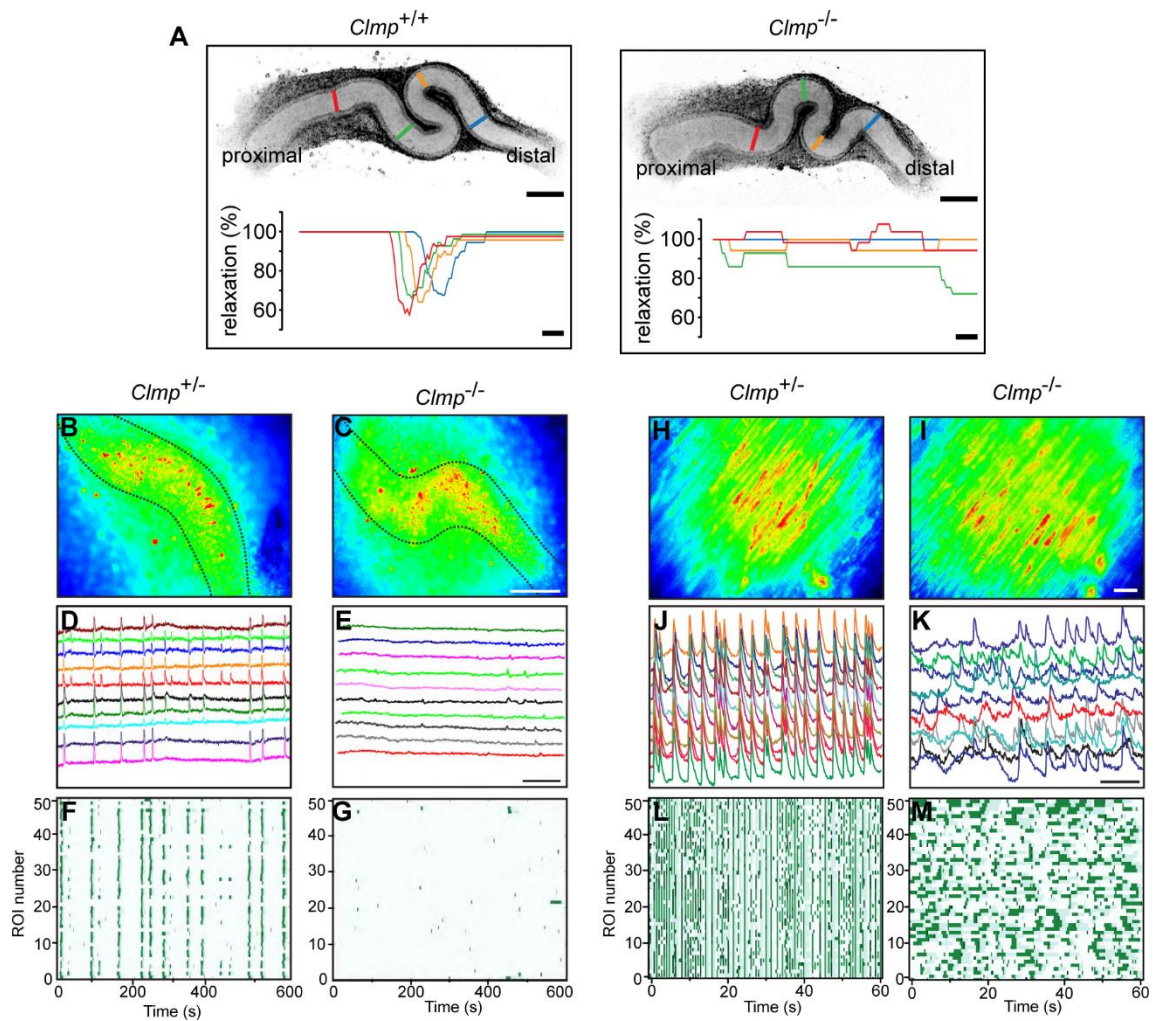

**Figure 4**  
**Impaired peristaltic ureteral motility and uncorrelated calcium transients indicate impaired cell-cell communication in smooth muscle cell layers of intestine and ureter.**

A) *Ex vivo* culture of wild type ureteral explants (left panel) displaying ureteral peristaltic contractions, whereas ureters lacking CLMP (right panel) fail to develop peristalsis. Time lapse recordings (270 ms intervals) of ureters from wild type and CLMP-deficient E15 embryos after 5 days *in vitro*. The images reveal peristaltic contraction waves in control ureters whereas mutant ureters display uncoordinated fibrillation-like movements that did not constrict the lumen diameter strongly. A single peristaltic wave is plotted as percent relaxation of the ureteral lumen diameter at the respective sites as indicated by colors. Contraction intensities were comparable to published data (Bush et al., 2006). Video recordings of cultured ureters

are available as supplemental information. In total 26 knockout, 10 wild type and 16 heterozygote ureter were analyzed with similar results.

Scale bar upper images, 200  $\mu\text{m}$ , and scale bar lower panels, 2 s.

B to G) Calcium imaging of ureteral explants of heterozygotes or CLMP-deficient mice were loaded with Fura-2 at DIV 5 (wild type n=3, heterozygotes n=5, knockout n=4).

B and C) Fluorescence images of Fura-2 loaded ureteral explants. Scale bar, 100  $\mu\text{m}$ .

D and E) Single traces of 10 selected regions of interest (ROIs) are shown. Scale bar, 100 s.

F and G) Raster plots of 50 simultaneously recorded ROIs.

H to M) Fluorescence images of Fura-2 loaded duodenal strips. Smooth muscle cell layer is oriented upside and villi down. Scale bar, 20  $\mu\text{m}$ .

J and K) Single traces of 10 selected regions of interest (ROIs) are shown from longitudinal smooth muscle cells. Scale bar, 5 s.

L and M) Raster plots of 50 simultaneously recorded ROIs. 12 strips from four animals in the age of six to eight weeks old were analyzed.



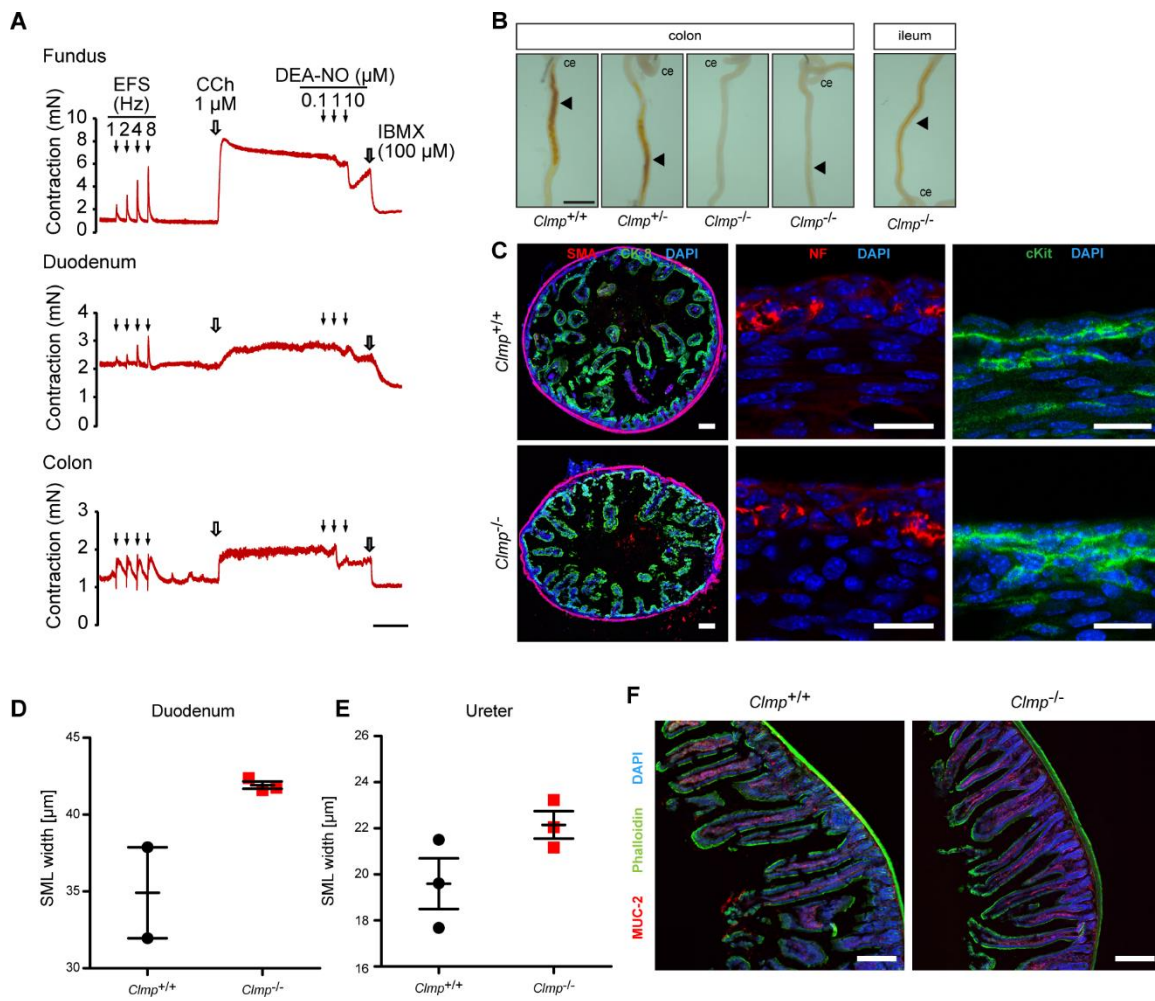

**Figure 5**

**The transport of meconium is delayed, the neurotransmission within the gastrointestinal tract is not impaired in CLMP-deficient mice and the thickness of the smooth muscle layer is slightly increased.**

A) Fundus strips or rings from duodenum or colon from P4 *Clmp*<sup>-/-</sup> mice were mounted in an organ bath with a resting tension of 1 mN. Electric field stimulation (EFS) was applied at 1, 2, 4 and 8 Hz inducing a response from various released transmitters including acetylcholine and NO. Then, tissues were pre-contracted with CCh (1  $\mu$ mol/L) followed by relaxation using increasing concentrations of DEA-NO followed by IBMX (100  $\mu$ mol/L). Shown are representative traces. Similar results were obtained from P2 tissue. Scale bar, 10 min.

B) Meconium was completely absent or found in tiny amounts in the colon at E18.5 in CLMP-deficient mutants in contrast to wild type. Meconium is occasionally detected in the mutant

ileum (right panel). In total 4 knockouts and 7 wild types or heterozygotes were inspected. Cecum – cecum. Scale bar, 20 mm.

C) Immunofluorescent stainings of cross sections with antibodies to smooth muscle actin (SMA), cytokeratin 8 (CK 8), neurofilament (NF) or c-Kit do not reveal differences in the duodenum of P1.5 wild type and CLMP-deficient mice. Scale bars in the left panels, 100  $\mu\text{m}$ ; in the middle and right panels, 20  $\mu\text{m}$ .

D and E) The cross-sectional thickness of the smooth muscle layer of the intestine and ureter showed a tendency to be increased. Cross sections of ureter or duodenum were stained by an antibody to smooth muscle actin and the width was measured in microscopic images. (See also Figure 7A and B; data are shown as mean  $\pm$  SEM, t-test,  $p = 0.051$  in D and  $p = 0.111$  in E).

F) Cross sections of the duodenum (4 weeks old) stained by phalloidin, DAPI and an antibody to mucin 2. The latter stains Goblet cells. The pattern of localization of Goblet cells was indistinguishable between wild type and *Clmp* knockout intestine. Bar, 200  $\mu\text{m}$ .

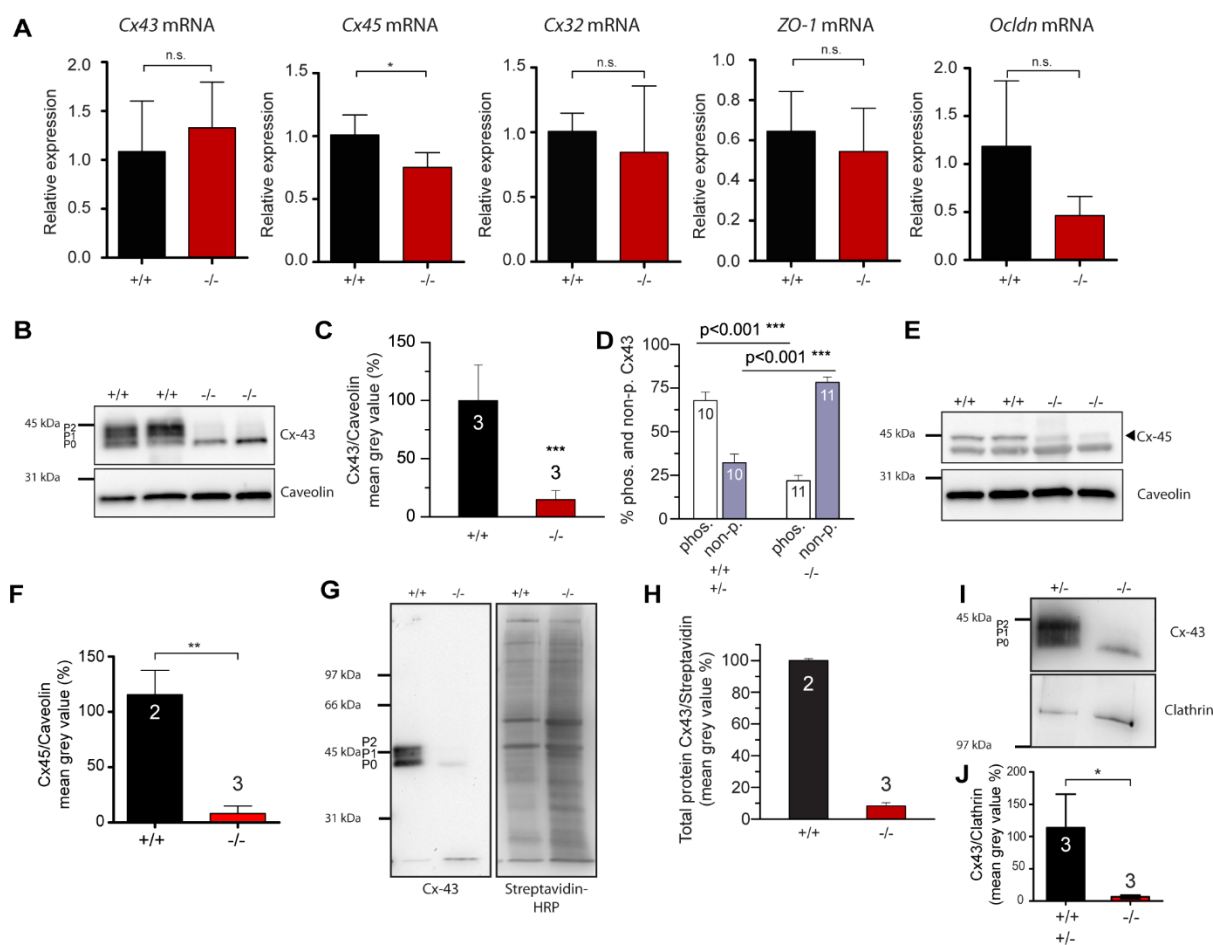

**Figure 6**

**Expression of Connexin43 and 45 is decreased in the intestinal smooth muscle cell layer and connexin43 in the ureter in the absence of CLMP**

A) qRT-PCR of Connexin43, 45, 32, ZO-1 and Occludin mRNAs reveal a slight down-regulation only for Connexin45. Rplp0 served as housekeeping gene. (Data are shown as mean  $\pm$  SD, Cx43 p=0.51, n=4 per genotype; Cx45 p=0.039, n=4 per genotype; Cx32 p=0.45, n=4 per genotype; ZO-1 p=0.55, n=3 for +/+ and n=4 for -/-; Ocld p=0.09, n=3 for +/+ and n=4 for -/-).

B and C) Connexin43 is strongly reduced in the smooth muscle layer of the intestine in the absence of CLMP. Anti-caveolin served as loading control.

D) Phosphorylation of Connexin43 in smooth muscle layer is reduced in *Clmp* mutants. P0 indicates unphosphorylated Connexin43 and P1 and P2 phosphorylated forms. Numbers in

columns indicate number of blots analyzed. The ratio of phosphorylated to non-phosphorylation was calculated.

E and F) Connexin45 (arrow head) expression is reduced in the smooth muscle cell layer of the intestine. Connexin45 levels were related to caveolin. Please note, a most likely unspecific band at 40 kDa is detected by the antibody to Connexin45 in intestinal smooth muscle cell layer of both genotypes. (Data shown as mean  $\pm$  SD,  $p=0.0035$ ,  $n=2$  for  $+/+$  and  $n=3$  for  $-/-$ ).

G and H) Enrichment of cell surface proteins from the smooth muscle layer of the intestine by the Sulfo-NHS-biotin method followed by Western blotting shows that Connexin43 is only very weakly expressed on the surface of smooth muscle cells. The right panel shows the labeling of the same blot with streptavidin-HRP to indicate loading. Surface expression of Connexin43 was related to total protein as detected by streptavidin-HRP.

I and J) Expression of Connexin43 in ureter is strongly reduced in *Clmp* knockout. Anti-Clathrin served as loading control. Please note that total ureter was blotted due to the low amount of tissue. Fat tissue could not be completely removed from the ureter. Molecular mass markers are indicated at the left of each panel showing Western blots. J) The level of Connexin43 in the ureteral tissue reached 5.7% of control values ( $p=0.023$ ).

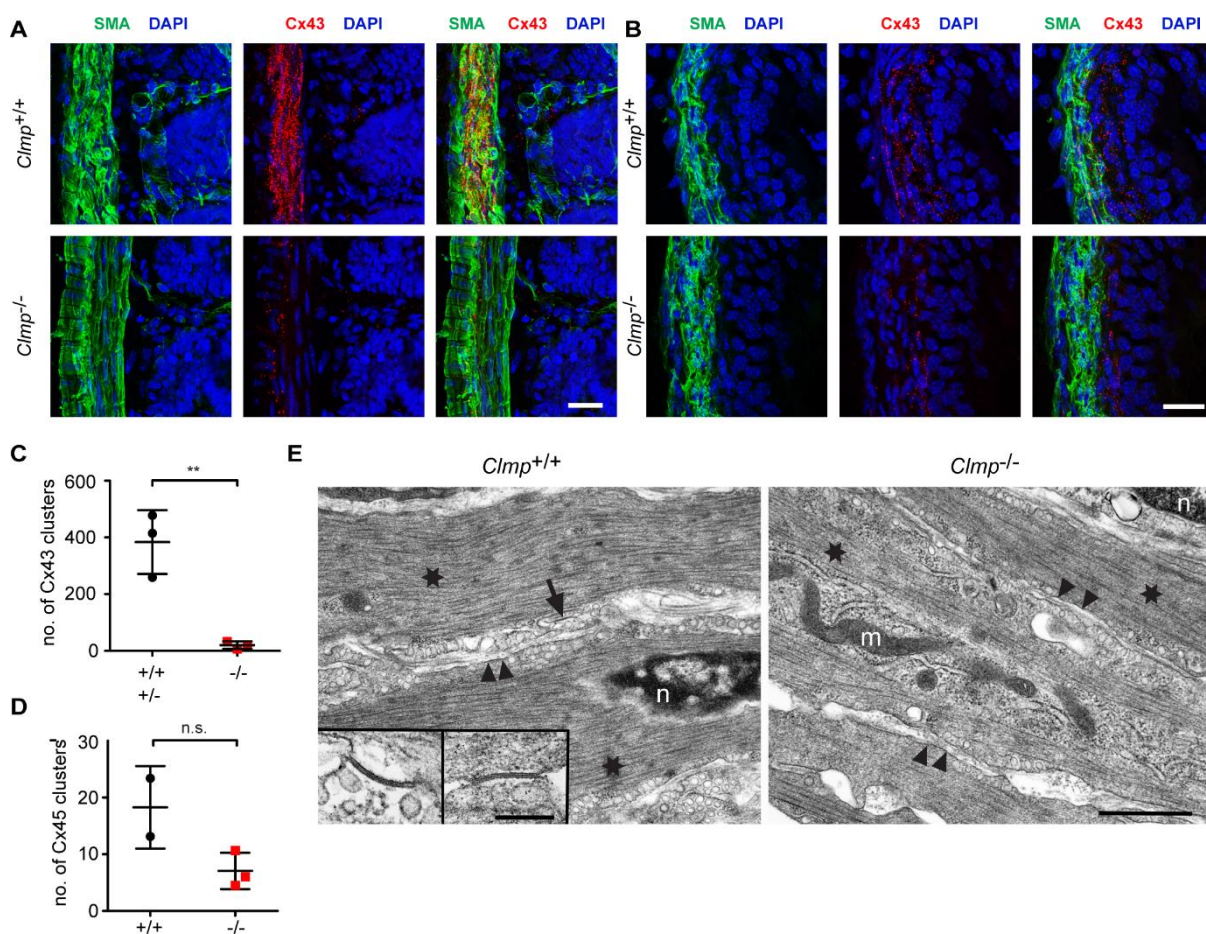

**Figure 7**  
**Connexin43 cluster are strongly reduced in CLMP-deficient duodenum and ureter**

A and B) Connexin43 plaques are reduced in the circular smooth muscle cell layer of CLMP-deficient duodenum (A) and smooth muscle layer of the ureter (B). In the ureter Connexin43 spots reached 21.9% of wild type values. Bar, 20  $\mu\text{m}$ .

C and D) shows the quantification of Connexin43 and Connexin45 spots in the duodenum. (Data shown as mean  $\pm$  SD Cx43 Cluster,  $p=0.0051$ ,  $n=3$  per genotype; Cx45 Cluster,  $p=0.089$ ,  $n=2$  for +/+ and  $n=3$  for -/-). Stainings for Connexin45 in the intestine are shown in Figure S9.

E) Ultrastructure of circular smooth muscle cells in the duodenum of wild type and CLMP-deficient mice. No differences were observed in the arrangement of actin-myosin filaments.

Gap junctions were only detected in wild types as indicated at higher magnifications in inserts. In total about 20 000  $\mu\text{m}^2$  and 50 000  $\mu\text{m}^2$  representing roughly 500 cells and 1250 cells in wildtype and knockout tissue, respectively, were inspected in 70 nm thick sections. Bar, 1 $\mu\text{m}$

and 200 nm (insert). n – nucleus; m – mitochondria; arrow – gap junction; arrow heads – plasma membrane; stars – actin-myosin filaments.

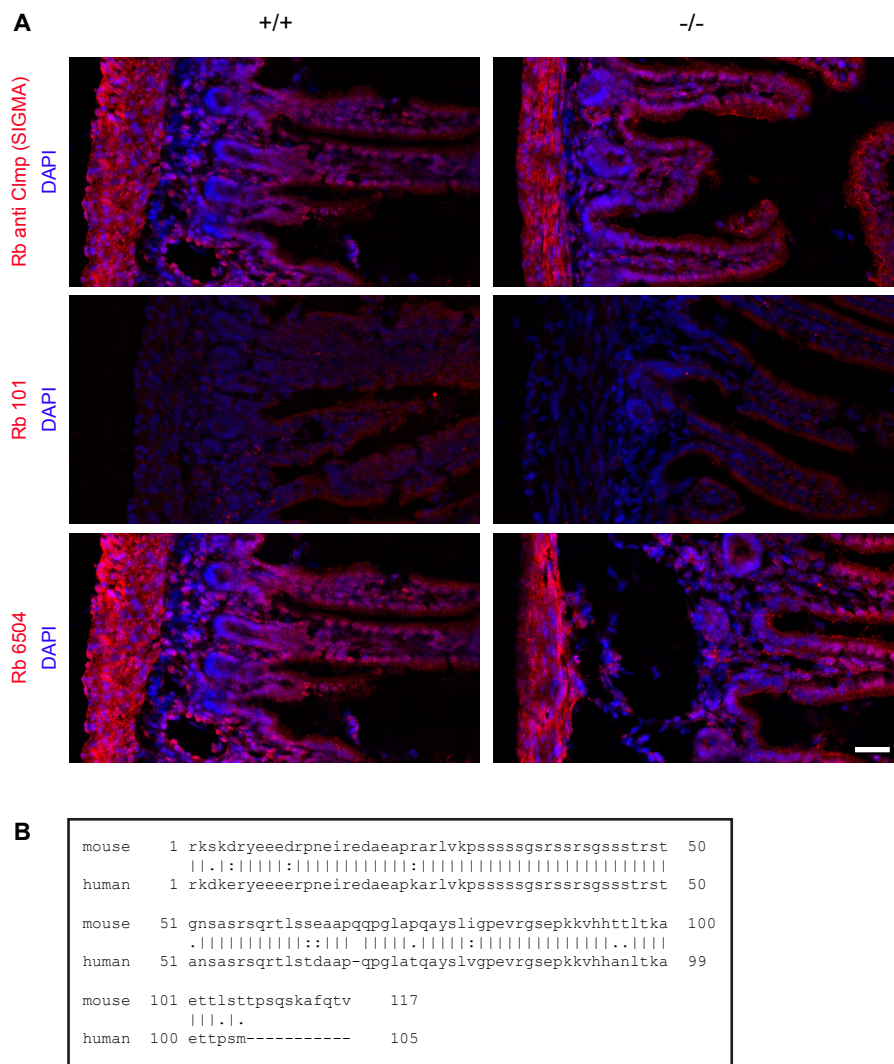

**Figure S1**

**Several antibodies to CLMP are improper in immunohistology to detect CLMP in the intestine.**

A) No specific staining was obtained in wild type tissue if compared with knockout intestine using commercially available antibodies [rabbit anti-ASAM (Biorbyt #orb100510) or rabbit anti-CLMP (Sigma #HPA002385, 1:100). Only the latter is shown here.], rabbit antibody (#6504) directed to the cytoplasmic segment or rabbit antibody 101 against the extracellular region of CLMP. The tissue from 4 weeks old animals was fixed in PFA for 1 hour. In addition an antigen retrieval protocol was tested. Scale bar, 20  $\mu$ m.

B) Alignment of the amino acid sequence of the cytoplasmic segments of human and mouse CLMP indicating high identity and predicting cross-reactivity of anti-hCLMP antibodies to detect murine CLMP.

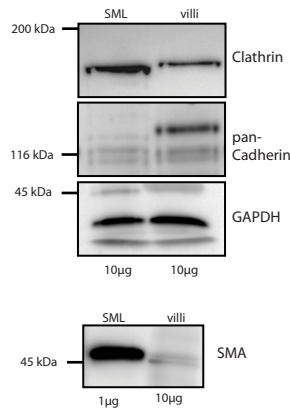

**Figure S2**

**Enrichment of smooth muscle cell layer and villi from intestine.**

Western blotting demonstrating the enrichment of the smooth muscle cell layer or villi preparations from intestine using antibodies to pan-Cadherin (a marker for the villi) and an antibody to smooth muscle actin. In the upper panel 10 µg of protein per lane was loaded. GAPDH and clathrin served as additional loading control. In the lower panel 1 µg of protein was loaded from the smooth muscle layer and 10 µg from villi. Molecular mass markers are indicated at the left of the panels.

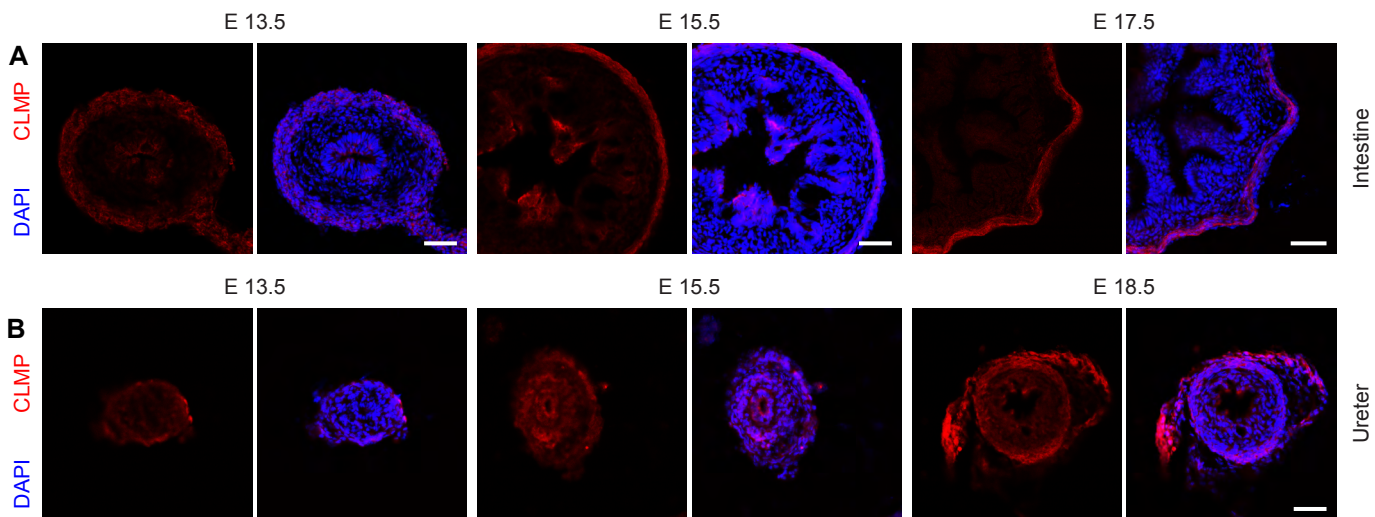

**Figure S3**

**Localization of CLMP in the embryonic intestine and ureter.**

Localization of CLMP in cross sections of intestine and ureter at different embryonic stages using affinity purified antibody 102 to the extracellular domain of mCLMP. CLMP is primarily localized in the developing smooth muscle layer and more weakly in the mucosa of the intestine and in the developing mesentery (see left panel of the intestine row). In ureter sections CLMP is also primarily expressed in the developing smooth muscle layer and in the surrounding fat tissue. Sections were counter-stained with DAPI. Bar, 50 µm.



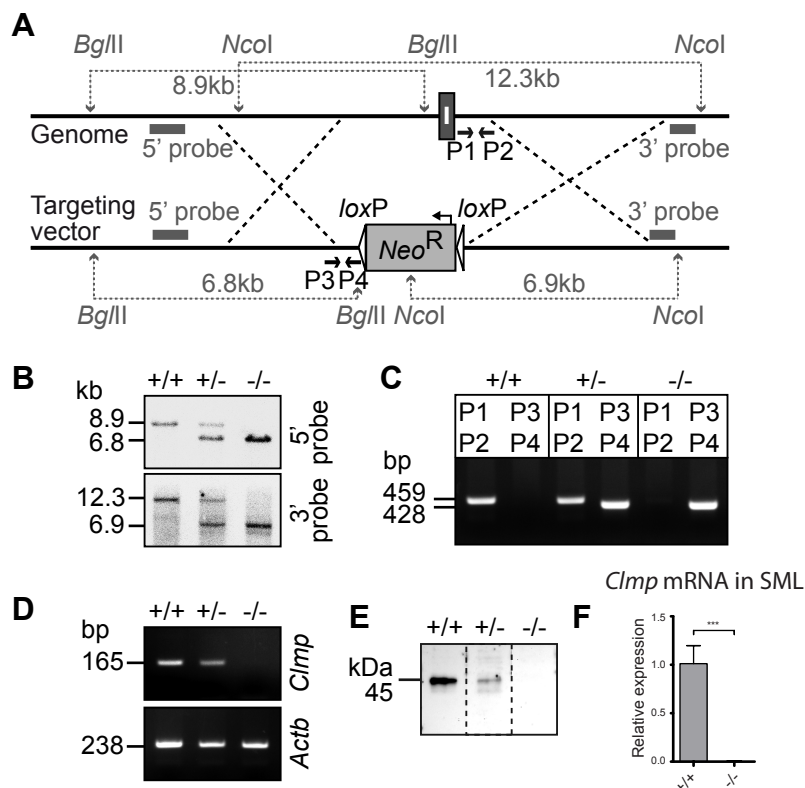

**Figure S4**  
**Generation of CLMP-deficient mutant mice.**

A) Targeting strategy for the generation of CLMP-deficient mice. The neomycin cassette, *loxP* sites and the *Bgl*III and *Nco*I restriction sites are depicted. Black bars represent the sequences used as 5' or 3' probes for Southern blot analysis. Arrows P1, P2, P3 and P4 show the positions of the primers used for genotyping by PCR. B) Southern blot after digestion of genomic DNA with *Bgl*III or with *Nco*I using 5' or 3' probes, respectively. C) PCR analysis of genomic DNA with primers P1 and P2 or P3 and P4 for amplification of the wild type or the mutant allele, respectively. A 459 bp product is generated from wild type allele and a 428 bp product from the targeted allele. D) RT-PCR of RNA extracted from brain tissue reveal the absence of CLMP encoding mRNA in CLMP-deficient mice. *Actb* amplification was used as control to verify integrity of total RNA isolation and cDNA reverse transcription. E) Western blot of membrane enriched fractions from brain tissue using an antibody to the cytoplasmic domain of CLMP demonstrate the absence of CLMP in mutant mice. A 46 kDa band is revealed in wild type or heterozygous mice. F) Quantitative RT-PCR of intestinal smooth muscle tissue (4 weeks old) from wild type and CLMP knockout mice. A 1050 fold higher value was detected in wild type in comparison to knockout indicating the absence of mRNA encoding *Clmp* in the CLMP knockout ( $p=0.0007$ ).

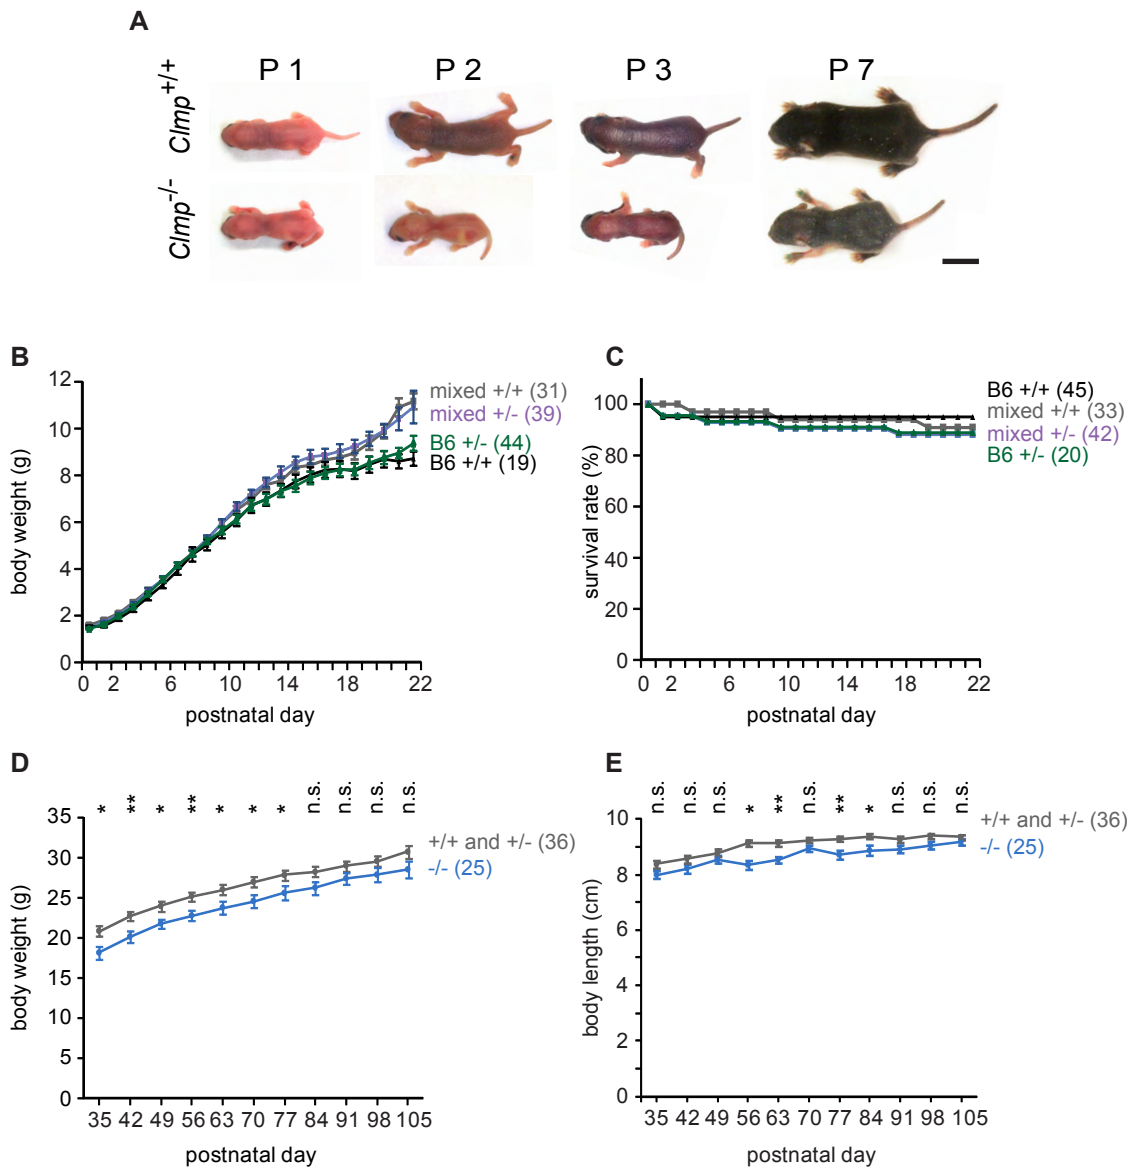

**Figure S5**

**Appearance of CLMP-deficient mice at early postnatal stages.**

A) Photographs of examples of CLMP-deficient and control littermates at early postnatal stages are shown. Scale bar, 1 cm.

B and C) Wild type animals (black, B6 background and gray, mixed background) do not differ from heterozygous littermates (green, B6 background and violet, mixed background) in their development of body weight (B) and survival rate (C). All comparisons between wild type and heterozygous genotypes within each strain are not significant. Numbers in brackets indicate numbers of analyzed animals.

D and E) Knockout mice of the mixed background strain (blue) at post-weaning stages display a significant delay in gain of body weight as compared to control littermates (pooled data of wild type and heterozygous mice; gray), whereas naso-anal body length (D) is almost comparable between control and knockout.

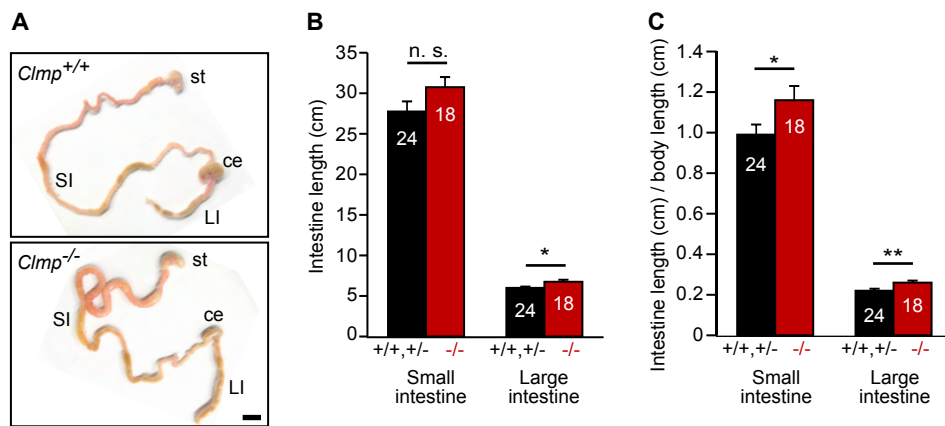**Figure S6****Intestinal length from adult CLMP-deficient mice does not differ from wild types.**

Intestines of adult mice (mixed genetic background) were dissected; gut lengths were measured and normalized to body weights. A) Examples, B) total intestine length and C) total intestine length related to body length. Numbers in brackets indicate numbers of analyzed animals. SI, small intestine; LI, large intestine; st, stomach; ce, cecum. Scale bar, 1 cm.

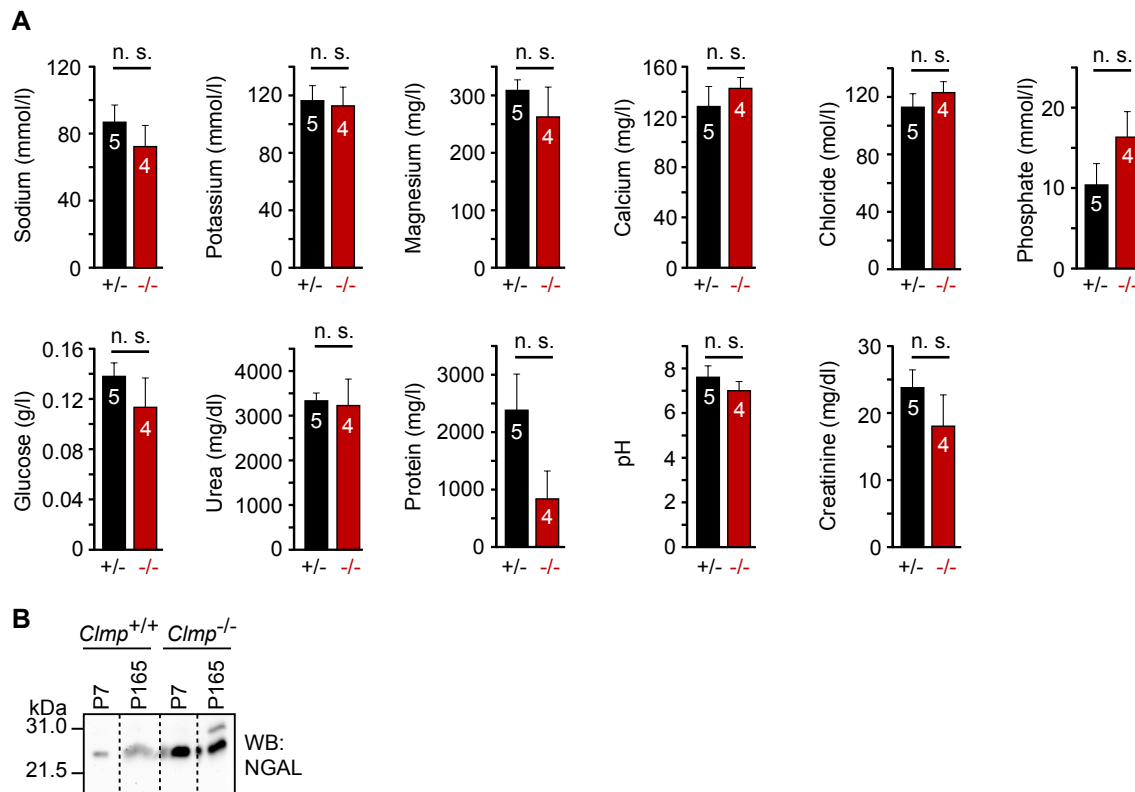**Figure S7****Urine composition and increased NGAL in CLMP-deficient mice.**

A) Urine analysis of adult *Clmp* mice (mixed genetic background) did not show any significant alterations in the levels of electrolytes, glucose, urea, protein, pH and creatinine in the absence of CLMP. Numbers in brackets indicate numbers of analyzed animals.

B) The concentration of urinary NGAL (neutrophil gelatinase-associated lipocalin) which is rapidly and massively induced during renal injury was increased in *Clmp* mutant mice (mixed background). Urine was collected by bladder puncture at P7 or P165. Equal volumes were loaded on a non-reducing SDS-PAGE and analysed by Western blotting.

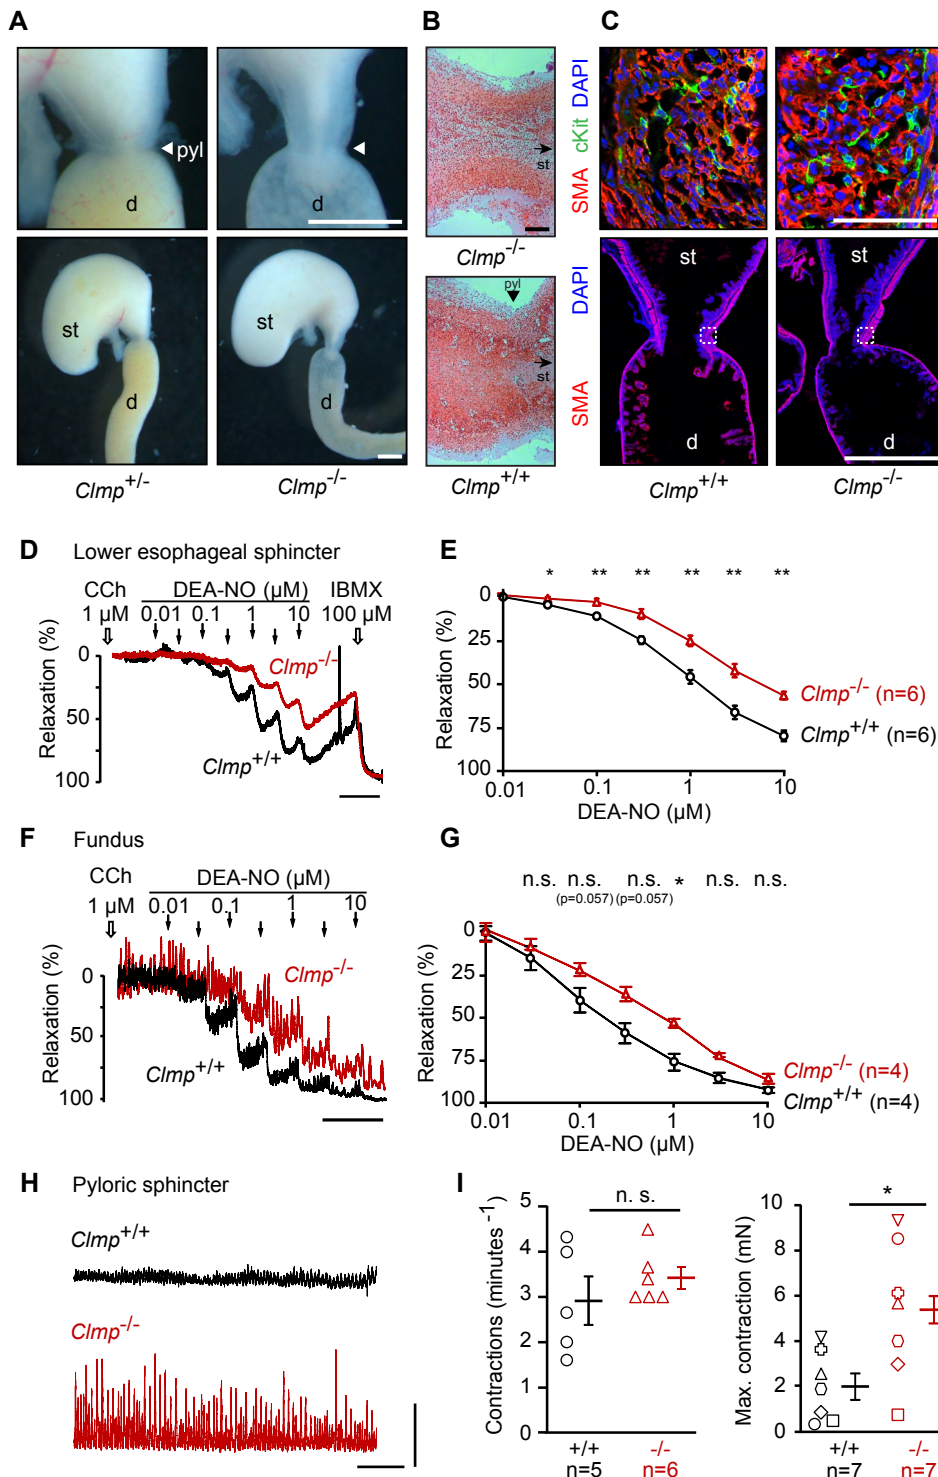

**Figure S8**  
**Increased muscle tone but no physical barriers in the CLMP-deficient gastrointestinal tract.**

A) Gastrointestinal dissections from P0.5 pups showing stomach (st) and duodenum (d) with pyloric region (pyl; arrow-head). A different shape at the transition zone from the antrum to the duodenum is observed. Seven out of eight animals showed this elongated shape. Scale bars, 1 mm. B) A narrowing of the pyloric opening was not detected in longitudinal HE-stained sections from P0.5 mice excluding a pyloric stenosis (arrow head). The arrow points to the direction of the stomach. Scale bar, 100  $\mu$ m. C) Sections of the P0.5 pylorus reveal a normal composition and thickness of cell layers including the presence of c-Kit-positive and smooth muscle cells. The small square in the lower images represents higher magnifications shown in the upper panels. Lower panels scale bar, 1 mm; upper panels scale bar 100  $\mu$ m.

D and E) Representative traces for NO-induced lower esophageal sphincter (LES) relaxation. LES from *Clmp*<sup>+/+</sup> and *Clmp*<sup>-/-</sup> mice were pre-contracted with carbachol (CCh, 1  $\mu$ mol/L) and subsequently relaxed with increasing concentrations of DEA-NO. IBMX was applied to determine maximal relaxation. Scale bar, 5 min. (E) Statistical analysis of LES data. F) and G) Fundus strips from *Clmp*<sup>+/+</sup> and *Clmp*<sup>-/-</sup> mice were pre-contracted with CCh (1  $\mu$ mol/L) and subsequently relaxed with increasing concentrations of DEA-NO. Data shown are mean  $\pm$  SEM of n = 4 per genotype.

H) Spontaneous rhythmic contractions of pyloric sphincter from P48 days old *CLMP*<sup>+/+</sup> and *CLMP*<sup>-/-</sup> mice. Horizontal scale bar, 5 min; vertical scale bar 2 mN.

I) Analysis of contractions per minute and analysis of maximal single contractions from P45-P50 old mice. Identical symbols indicate *Clmp*<sup>+/+</sup> and *Clmp*<sup>-/-</sup> mice siblings measured on the same day (p=0.0379; Mann-Whitney-U-Test).

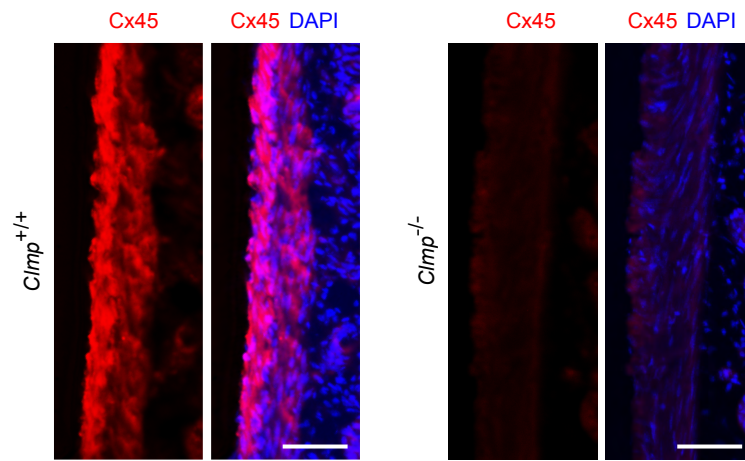

### Figure S9

#### Localization of Connexin45 in the duodenum in wild type and CLMP-deficient mice.

A and B) Connexin45 plaques are reduced in the circular smooth muscle cell layer of CLMP-deficient duodenum (A). Quantitative data are presented in Figure 7D. Bar, 50  $\mu$ m.

|                  |                  | <i>Clmp</i> <sup>+/+</sup> | <i>Clmp</i> <sup>+/-</sup> | <i>Clmp</i> <sup>-/-</sup> |
|------------------|------------------|----------------------------|----------------------------|----------------------------|
| mixed background | number of pups   | 63                         | 115                        | 40                         |
|                  | percentage       | 28.90 %                    | 52.75 %                    | 18.35 %                    |
|                  | Chi <sup>2</sup> | 1.3257                     | 0.3303                     | 3.8578                     |
| B6 background    | number of pups   | 71                         | 136                        | 49                         |
|                  | percentage       | 27.73 %                    | 53.13 %                    | 19.14 %                    |
|                  | Chi <sup>2</sup> | 0.7656                     | 0.5000                     | 3.5156                     |

**Table S1**

Configural frequency analysis of recovery of Mendelian ratio in newborn pups (P0.5) from heterozygous-to-heterozygous mating. Animal numbers with a Chi<sup>2</sup> value > 3.841 are under-represented. Monitoring was done at noon.

| Organ      | Genotype       | Organ weight (g)     |           | Ratio organ weight/ body weight |           | Ratio organ weight/ body length |           |
|------------|----------------|----------------------|-----------|---------------------------------|-----------|---------------------------------|-----------|
|            |                | Value                | P         | Value                           | P         | Value                           | P         |
| Brain      | Ctrl. (n = 15) | 0.601 ± 0.015        | P = 0.005 | 0.022 ± 0.001                   | P = 0.586 | 0.066 ± 0.008                   | P = 0.122 |
|            | KO (n = 10)    | 0.531 ± 0.016        | ** [t]    | 0.021 ± 0.001                   | n.s. [t]  | 0.061 ± 0.005                   | n.s. [t]  |
| St. + Int. | Ctrl. (n = 18) | 3.322 ± 0.150        | P < 0.001 | 0.124 ± 0.005                   | P < 0.001 | 0.365 ± 0.014                   | P < 0.001 |
|            | KO (n = 12)    | <b>4.563 ± 0.210</b> | *** [t]   | <b>0.183 ± 0.008</b>            | *** [t]   | <b>0.529 ± 0.022</b>            | *** [t]   |
| Heart      | Ctrl. (n = 16) | 1.181 ± 0.008        | P = 0.056 | 0.007 ± 0.000                   | P = 0.353 | 0.020 ± 0.001                   | P = 0.184 |
|            | KO (n = 11)    | 0.155 ± 0.010        | n.s. [MW] | 0.006 ± 0.000                   | n.s. [t]  | 0.018 ± 0.001                   | n.s. [t]  |
| Kidney     | Ctrl. (n = 36) | 0.224 ± 0.007        | P < 0.001 | 0.008 ± 0.000                   | P < 0.001 | 0.025 ± 0.001                   | P < 0.001 |
|            | KO (n = 22)    | <b>0.837 ± 0.062</b> | *** [MW]  | <b>0.033 ± 0.002</b>            | *** [MW]  | <b>0.097 ± 0.007</b>            | *** [MW]  |
| Liver      | Ctrl. (n = 16) | 1.389 ± 0.058        | P = 0.217 | 0.050 ± 0.002                   | P = 0.694 | 0.152 ± 0.006                   | P = 0.838 |
|            | KO (n = 11)    | 1.292 ± 0.077        | n.s. [MW] | 0.051 ± 0.003                   | n.s. [t]  | 0.150 ± 0.009                   | n.s. [t]  |
| Lung       | Ctrl. (n = 17) | 0.245 ± 0.008        | P = 0.003 | 0.009 ± 0.000                   | P = 0.422 | 0.026 ± 0.001                   | P = 0.056 |
|            | KO (n = 11)    | 0.210 ± 0.006        | ** [t]    | 0.008 ± 0.000                   | n.s. [t]  | 0.024 ± 0.001                   | n.s. [t]  |
| Spleen     | Ctrl. (n = 16) | 0.114 ± 0.010        | P = 0.049 | 0.004 ± 0.000                   | P = 0.312 | 0.013 ± 0.001                   | P = 0.079 |
|            | KO (n = 11)    | 0.087 ± 0.010        | * [MW]    | 0.003 ± 0.000                   | n.s. [MW] | 0.010 ± 0.001                   | n.s. [MW] |

**Table S2**

### Wet weight analysis of organs of the *Clmp*-deficient mice (mixed background) at P97 - P140.

St., stomach; Int., intestine; Ctrl., control; KO, knockout; *t*, *t*-test; MW, Mann-Whitney-*U* test; n.s., not significant; \* indicating  $P \leq 0.05$ , \*\* indicating  $P \leq 0.01$  and \*\*\* indicating  $P \leq 0.001$ . Significant changes in kidney and the gastrointestinal tract are printed in bold.

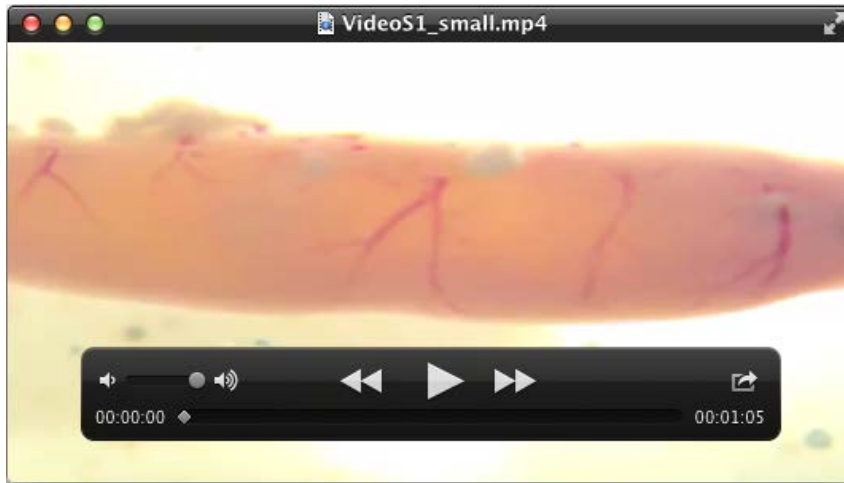

### Video S1

Movement of a duodenal segment in an organ bath from wild type, real time.

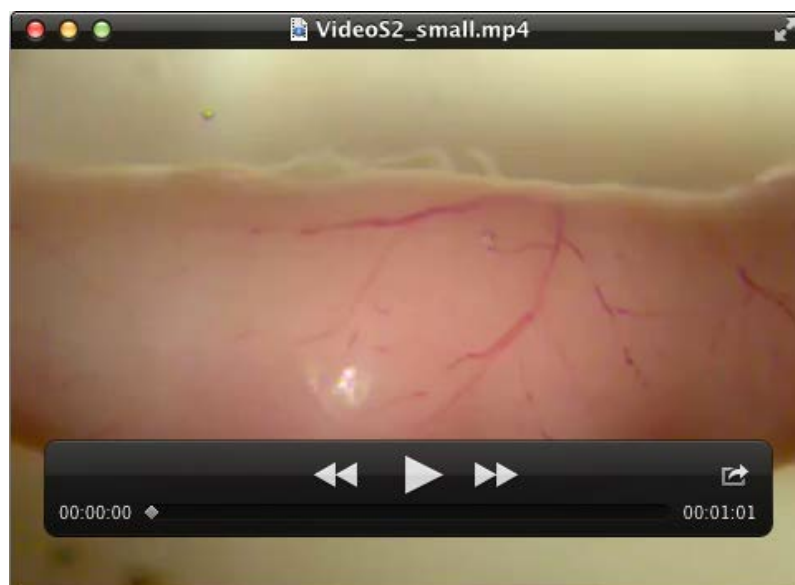

### Video S2

Movement of a duodenal segment in an organ bath from CLMP knockout, real time.

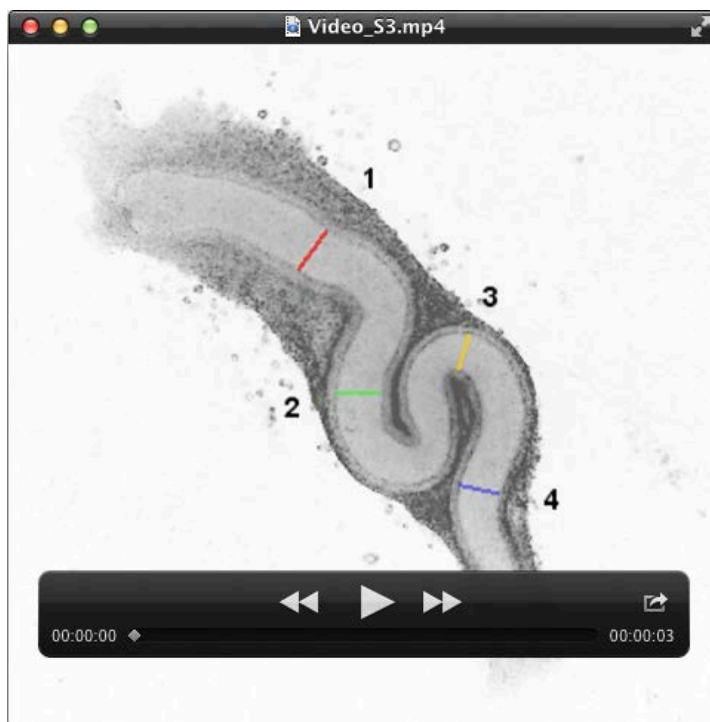

### Video S3

Contraction of a cultured ureter from wild type, time lapse at 270 ms intervals.

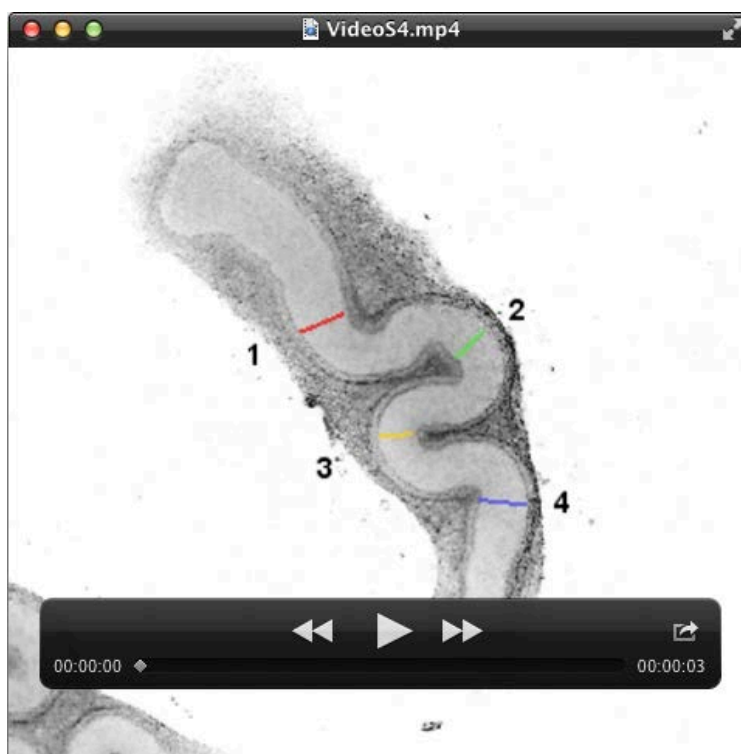

### Video S4

Contraction of a cultured ureter from CLMP knockout, time lapse at 270 ms intervals.
